1 **Differential sensitivity to hypoxia enables shape-based classification of sickle cell disease and**  
2 **trait blood samples**

3

4 Claudy D’Costa<sup>a,1</sup>, Oshin Sharma<sup>a,1</sup>, Riddha Manna<sup>a</sup>, Minakshi Singh<sup>a</sup>, Samrat<sup>a,b</sup>, Srushti  
5 Singh<sup>a,b</sup>, Anish Mahto<sup>a</sup>, Pratiksha Govil<sup>a</sup>, Sampath Satti<sup>a</sup>, Ninad Mehendale<sup>a</sup>, and Debjani  
6 Paul<sup>a,c,2</sup>

7

8 <sup>a</sup>Department of Biosciences and Bioengineering, Indian Institute of Technology Bombay, Powai,  
9 Mumbai 400076, Maharashtra, India

10

11 <sup>b</sup>MedPrime Technologies Pvt. Ltd., Casa Piedade Co-operative Housing Society, Charai,  
12 Thane – 400601, Maharashtra, India

13

14 <sup>c</sup>Associate faculty, Wadhvani Research Centre for Bioengineering, Indian Institute of  
15 Technology Bombay, Powai, Mumbai 400076, Maharashtra, India

16

17

18 <sup>1</sup>Equal contributions

19 <sup>2</sup>To whom correspondence may be addressed: [debjani.paul@iitb.ac.in](mailto:debjani.paul@iitb.ac.in); ORCID: 0000-0001-9281-  
20 3516

21

22 Keywords: sickle cell anemia diagnosis, smartphone microscopy, microfluidics, RBC shapes,  
23 shape-based classifier

24

25 **Abstract**

26 In sickle cell anemia patients, red blood cells (RBCs) are known to become sickle shaped and stiff  
27 under hypoxic conditions as a consequence of hemoglobin polymerization. While RBC shape can  
28 discriminate sickle blood from healthy, it has not been used until now as a sole biophysical marker  
29 to differentiate between homozygous (disease) and heterozygous (trait) sickle blood samples. Here,  
30 we establish a technique based on the differential response of disease and trait RBCs to chemically-  
31 induced hypoxia to distinguish between these samples for the first time. By comparing the RBC  
32 shape distributions in blood treated with high and low concentrations of the hypoxia-inducing  
33 agent, we correctly identify 35 unknown blood samples as healthy, sickle cell disease or trait.  
34 Finally, we demonstrate our image-based classification technique with a portable smartphone  
35 microscope and a disposable microfluidic chip as a prospective point-of-care device enabling fast  
36 and confirmed diagnosis of sickle cell anemia.

37

38 **Significance statement**

39 Red blood cells (RBCs) of individuals with sickle cell anemia exhibit characteristic shapes in low  
40 oxygen environments. The shape of a sickle RBC is determined by its hemoglobin content and  
41 how fast oxygen is removed from its surroundings. We report a technique to distinguish between  
42 sickle cell carriers and individuals with sickle cell anemia within an hour by treating whole blood  
43 with a chemical that removes oxygen, imaging the blood sample inside a microfluidic chamber  
44 using a smartphone microscope and finally comparing the shapes of the sickle cells using a  
45 classification scheme. We demonstrate the proof of concept of a biophysical test based on the  
46 analysis of RBC shapes for point-of-care diagnosis of sickle cell disease in low resource settings.

47

## 48 Main

49 Sickle cell anemia is a genetic disorder caused by a glutamine to valine mutation in the  $\beta$ -globin  
50 gene [1]. It results in partial or complete replacement of normal adult hemoglobin (HbA) with  
51 mutated sickle hemoglobin (HbS). HbS polymerizes under hypoxic conditions and forms rigid  
52 and misshapen red blood cells (RBCs). The loss of deformability of RBCs leads to frequent vaso-  
53 occlusive crisis, joint pain, spleen damage, increased susceptibility to infection and anemia. While  
54 there is no cure available for sickle cell anemia, early diagnosis can prevent child mortality and  
55 improve the quality of life of the affected individuals.

56 The disease is prevalent in many parts of the world including western Africa, Latin America, the  
57 Arab peninsula, and India [2]. More than 500 children die of sickle cell anemia every day due to  
58 lack of diagnosis [3]. There are no comprehensive pre-natal and newborn screening programs in  
59 low- and medium-income countries (LMIC). Screening and diagnosis of older adults in LMICs  
60 are carried out in two stages. First, a solubility test screens for HbS-positive individuals. Second,  
61 hemoglobin electrophoresis or high-performance liquid chromatography (HPLC) confirms the  
62 diagnosis and distinguishes sickle cell disease (homozygous) from trait (heterozygous) [4]. The  
63 infrastructure and the trained personnel required to perform these tests are not always available in  
64 LMICs to sustain countrywide screening programs [5].

65 Preparation of blood smear slides and their microscopic examination are diagnostic techniques that  
66 are relatively easier to administer in LMICs. Despite the widespread use of microscopy to study  
67 sickle blood in the early days [6] [7] [8] [9], it is no longer a technique preferred by the clinicians.  
68 Sickle blood has only 5% - 25% irreversibly sickled cells (ISCs) [10], requiring extensive scanning  
69 of each smear slide by a technician. While use of a chemical oxygen scavenger, such as sodium  
70 dithionate or sodium metabisulphite, allows more RBCs to sickle *in vitro*, the process can take as  
71 long as 24 hours for trait blood samples. Most importantly, it is not possible to conclusively  
72 distinguish between sickle cell disease and trait blood by simple visual inspection of RBC shapes.

73 Several research groups have explored image processing or machine learning techniques to study  
74 RBC morphologies [11] [12] [13] [14] [15] [16] [17] [18]. These techniques have focused on  
75 accurate classification of individual RBC shapes into normal (biconcave), sickle or abnormal (i.e.  
76 having any shape other than biconcave or sickle). None of these reports have used RBC shape as  
77 a sole biophysical marker to classify sickle blood samples into disease or trait. Recently, Javidi  
78 and others classified blood samples into healthy and sickle based on membrane fluctuation analysis  
79 of individual RBCs [19]. De Haan *et al* developed a mobile phone microscope to image blood  
80 smears, followed by automated identification of ISCs in these images [20]. As a shortcoming of  
81 their method, the authors stated that blood smears cannot be used to identify sickle cell genotypes,  
82 i.e. to discriminate between trait and disease blood samples.

83 Here, we combine microfluidics, smartphone microscopy and image processing techniques (**figure**  
84 **1**) to develop a method that accurately distinguishes between disease and trait sickle blood based  
85 on the differential shape changes of RBCs when treated with two different concentrations of an  
86 oxygen scavenger, sodium metabisulphite. As shown in **figure 1A**, the method consists of mixing  
87 a drop of blood with a specific concentration of sodium metabisulphite, loading it into a

88 microfluidic chip and imaging the sickled RBCs in real time using a smartphone microscope. The  
89 roundness distributions of RBCs after 30 min are used to classify the blood sample as healthy,  
90 disease or trait. The use of a microfluidic chip (figure 2B) as an imaging chamber instead of a  
91 smear slide enables fast sickling and

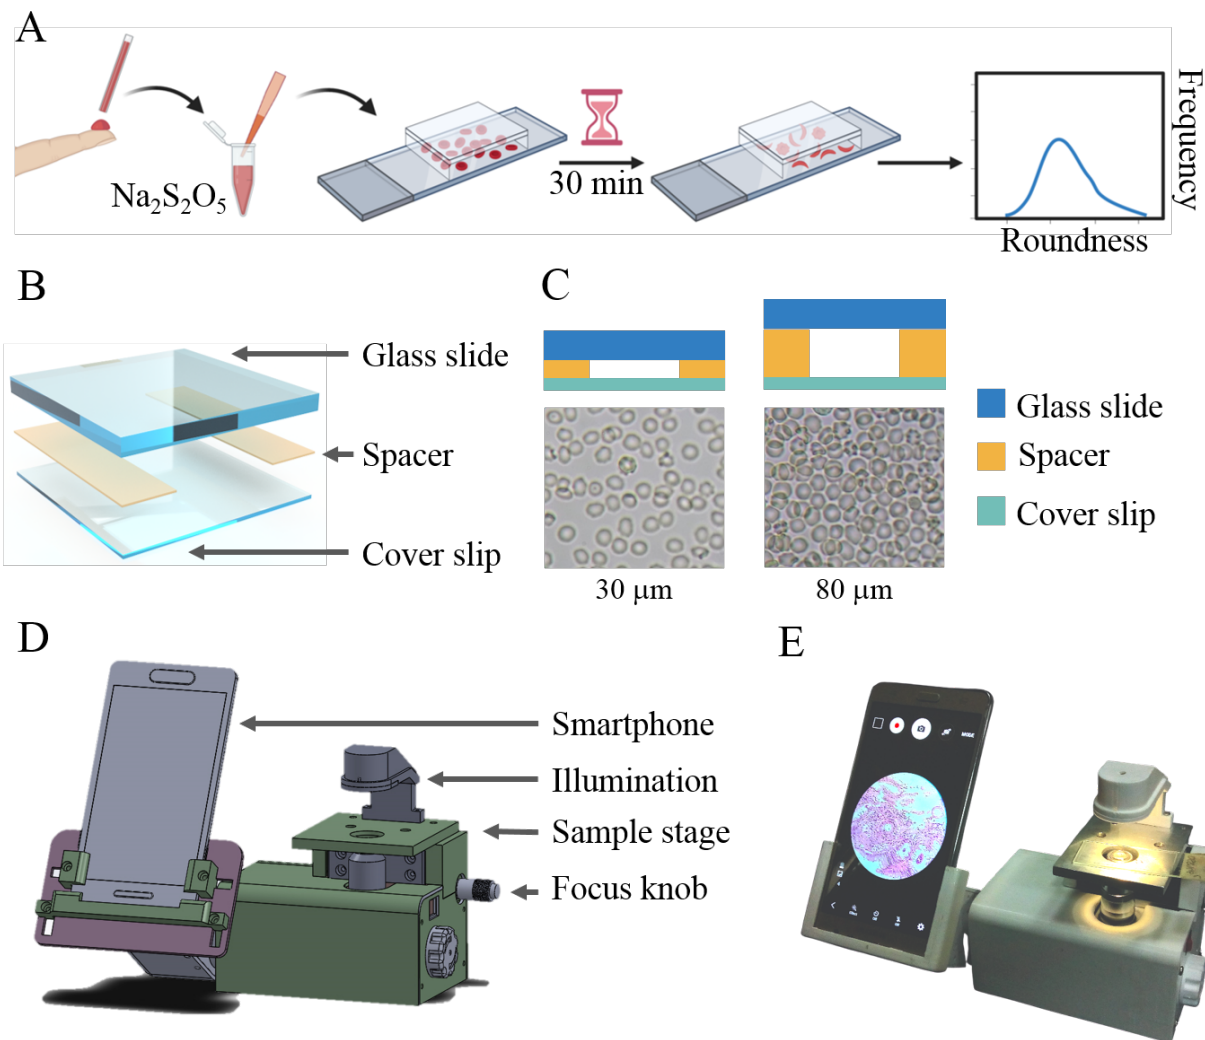

92  
93  
94  
95  
96  
97  
98  
99  
100  
101  
102

Figure 1. An assay to induce controlled sickling of RBCs inside a microfluidic chip, followed by imaging and analysis of RBC shapes. (A) A drop of blood is added to an oxygen scavenger ( $\text{Na}_2\text{S}_2\text{O}_5$ ), introduced into a microfluidic chamber and sealed. We image the sample after 30 min and analyze the RBC shapes to obtain a characteristic roundness distribution. (B) Exploded view of the microfluidic chamber. The thickness of the spacer determines the height of the chamber. (C) Optimisation of microfluidic chamber height. RBCs inside a 30  $\mu\text{m}$  high chamber are oriented flat, while they are stacked and randomly oriented when the height is 80  $\mu\text{m}$ . (D) Schematic diagram of the microscope showing LED illumination, sample stage and the focusing knob. (E) A photo of the portable smartphone microscope designed and fabricated by us.

103 tracking of RBC shapes in real time. The chip is made of glass to facilitate brightfield imaging of  
104 unstained RBCs using a mobile phone microscope and to maintain hypoxic conditions inside the  
105 chamber for the duration of the experiment. We optimized the height of the chamber to be 30  $\mu\text{m}$   
106 (**figure 1C**) to avoid stacking of RBCs. We also designed and fabricated a portable smartphone  
107 microscope (**figures 1D** and **1E**) to conduct our experiments outside the laboratory at sickle cell  
108 screening camps. More details about optimizing the microfluidic chip design (**figure S1**) and the  
109 smartphone microscope (**figure S2**) can be found in the supporting information.

110

## 111 **Difference in polymerization of sickle hemoglobin in disease and trait blood leads to different** 112 **RBC shapes**

113 I. J. Sherman first connected the shapes of sickled RBCs to the rate of oxygen removal by noting  
114 that slow deoxygenation resulted in RBCs with sickle shapes, while sudden deoxygenation made  
115 them granular. He reported that disease blood had more sickled RBCs in it compared to trait blood  
116 [6]. A relation between RBC shapes and polymerization kinetics of sickle hemoglobin (HbS) was  
117 later proposed by Eaton and Hofrichter. Based on extensive *in vitro* studies on HbS, they predicted  
118 that sickle shapes of RBCs are likely to result from the growth of a single polymer domain during  
119 slow polymerization. Presence of multiple small polymer domains with shorter fibers should lead  
120 to holly leaf cell shapes. When there are many more randomly oriented and very short fibers, RBCs  
121 will become granular [21]. Direct experimental evidence of this prediction using linear dichroism  
122 microscopy was provided by Mickols et al [22] and by Corbett et al [23]. They measured the  
123 distribution and orientation of aligned hemoglobin polymer domains inside RBCs and related it to  
124 different cell shapes.

125 **Figure 2** illustrates different HbS polymerization mechanisms in disease and trait blood and the  
126 associated RBC shapes. The total hemoglobin in homozygous sickle blood consists of 95% - 98%  
127 HbS, 2% - 3% HbA<sub>2</sub> (another variant of normal hemoglobin) and 2% HbF (fetal hemoglobin).  
128 Heterozygous sickle cell blood contains 35% - 45% HbS, 50% - 65% HbA, 2% - 3% HbA<sub>2</sub> and ~  
129 2% HbF [24]. As shown in **figure 2A**, blood from healthy individuals has HbAA homodimers  
130 ( $\alpha_2\beta_2$ ), sickle cell disease blood has HbSS homodimers ( $\alpha_2\beta^S_2$ ), and trait blood contains a mix of  
131 HbAA homodimers ( $\alpha_2\beta_2$ ), HbSS homodimers ( $\alpha_2\beta^S_2$ ) and HbAS heterodimers ( $\alpha_2\beta\beta^S$ ).

132 According to the double nucleation model proposed by Ferrone *et al*, hemoglobin polymerization  
133 can proceed by homogenous or heterogeneous nucleation (**figure 2B**) [25]. Homogeneous  
134 nucleation involves growth of independent polymer chains from HbS molecules in solution,  
135 whereas heterogeneous nucleation involves formation of branches on already existing polymers.  
136 Even though homogeneous nucleation is thermodynamically less favorable, Ferrone and others  
137 suggested that it can be sustained in samples with high initial HbS concentration for a longer  
138 duration before heterogeneous nucleation takes over. Since sickle cell disease blood has high HbS  
139 concentration, we infer that these samples are likely to sustain homogeneous nucleation for some  
140 time. The authors further observed that fast deoxygenation leads to more homogeneous nucleation  
141 sites and formation of randomly oriented polymer chains. Hence, we expect that faster

142 deoxygenation in disease samples would lead to more granular RBCs and very few, if any, sickle-  
 143 shaped RBCs. Slow deoxygenation in these samples would lead to sickle RBCs, resulting from  
 144 sustained homogeneous nucleation, as well as some holly leaf and granular RBCs formed due to  
 145 heterogeneous nucleation.

146

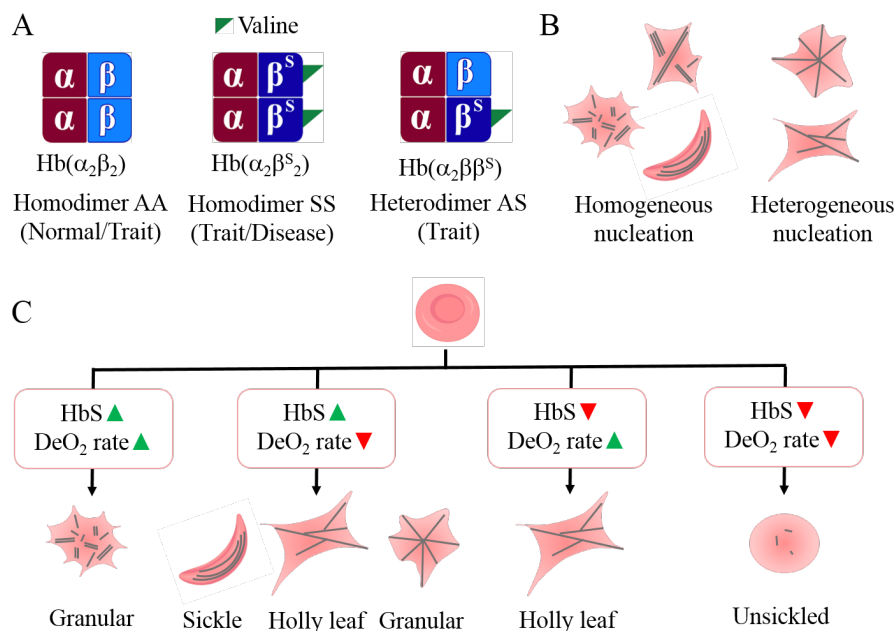

147 *Figure 2. Schematic diagram relating hemoglobin polymerization to the shapes of sickled RBCs. (A)*  
 148 *Hemoglobin in healthy blood samples exists as homodimer A ( $\alpha_2\beta_2$ ). This homodimer is also found in trait*  
 149 *blood. Sickle hemoglobin can either exist as a homodimer S ( $\alpha_2\beta^S_2$ ) found in both trait and disease blood,*  
 150 *or as a heterodimer ( $\alpha_2\beta\beta^S$ ), found only in trait blood. (B) During hemoglobin polymerization,*  
 151 *homogeneous nucleation leads to one or more non-branched polymer chains, while heterogeneous*  
 152 *nucleation leads to branched polymers. The type of hemoglobin polymerization taking place inside an RBC*  
 153 *affects its shape. (C) A pictorial summary of how shapes of sickled RBCs depend on HbS concentration and*  
 154 *deoxygenation rate. Green ‘up triangle’ symbol indicates a high HbS concentration or fast deoxygenation.*  
 155 *Red ‘down triangle’ symbol indicates low HbS concentration or slow deoxygenation.*

156

157 In addition to HbS concentration and the rate of deoxygenation, HbS polymerization in trait  
 158 samples is also affected by the presence of HbAS heterodimers which can constitute as much as ~  
 159 49% mole fraction of the total hemoglobin [26]. HbS concentration in trait samples is too low to  
 160 sustain homogeneous nucleation. Moreover, HbAS heterodimers have a lower probability to take  
 161 part in polymerization compared to HbSS homodimers [27]. Under slow deoxygenation, due to a  
 162 lack of nucleation sites, RBC morphology in trait blood appears to be unchanged. When  
 163 deoxygenation is rapid, trait RBCs deform into primarily holly leaf shapes resulting from  
 164 heterogeneous nucleation. **Figure 2C** summarizes the combined effect of HbS concentration and  
 165 rate of deoxygenation on RBC shapes. Our shape-based classification method to identify unknown

166 blood samples makes use of the variation in RBC shapes in disease and trait samples in response  
 167 to slow and fast deoxygenation.

168

169 **Specific concentrations of sodium metabisulphite lead to slow and fast deoxygenation**

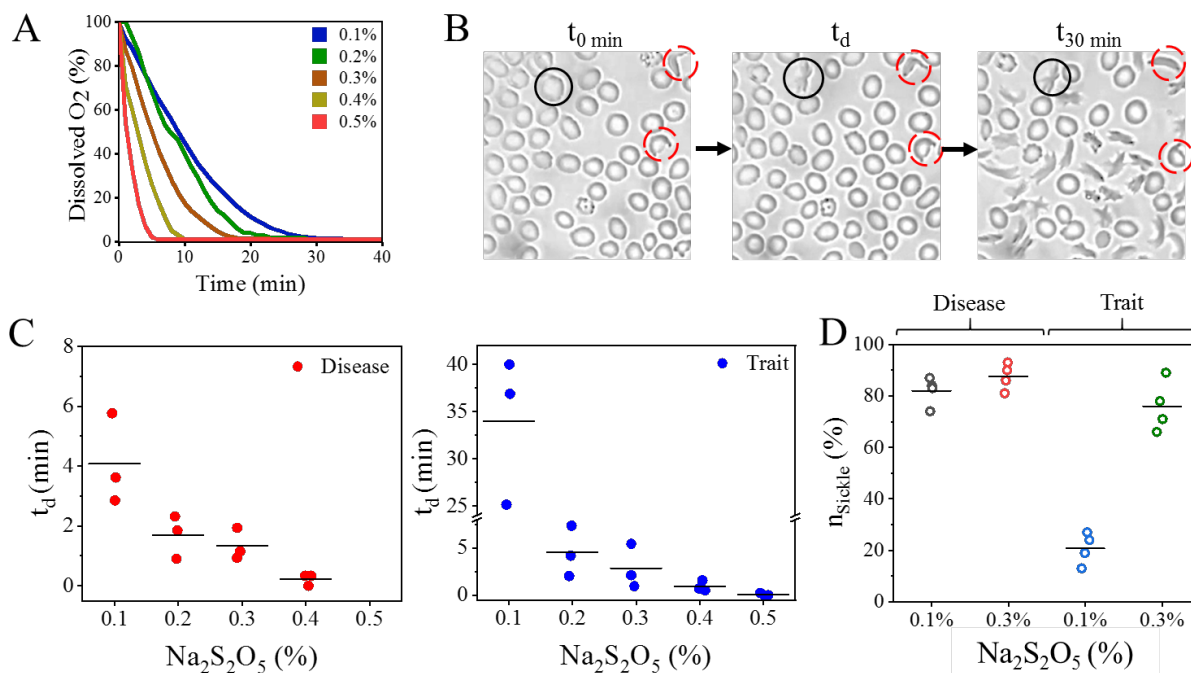

170

171 *Figure 3. Optimization of sodium metabisulphite concentration to induce slow and fast deoxygenation in*  
 172 *disease and trait blood samples. (A) Decrease in the dissolved oxygen in cell culture media (RPMI-1640)*  
 173 *with time for different concentrations of sodium metabisulphite. (B) Schematic representation of the time*  
 174 *( $t_d$ ) taken by the first unsickled RBC (enclosed by the black circle) in the field of view to sickle. Irreversibly*  
 175 *sickled RBCs are encircled in dashed red. (C)  $t_d$  as a function of sodium metabisulphite concentration in*  
 176 *three distinct disease and three distinct trait samples, represented as mean  $\pm$  SEM ( $N = 3$ ). (D) Number of*  
 177 *sickled RBCs in disease ( $N = 4$ ) and trait ( $N = 4$ ) samples treated with 0.1% and 0.3% sodium*  
 178 *metabisulphite respectively. The horizontal lines indicate the mean values in all the plots in (C) and (D).*

179

180 We optimized the concentration (w/v) of sodium metabisulphite with the goal of identifying two  
 181 specific concentrations at which disease and trait samples are likely to undergo slow and fast  
 182 deoxygenation resulting in different RBC shapes. We added 0.1% to 0.5% of sodium  
 183 metabisulphite to cell culture media (RPMI-1640) and measured its dissolved oxygen content for  
 184 40 min. **Figure 3A** shows a plot of the dissolved oxygen content as a function of time for different  
 185 concentrations of sodium metabisulphite. For the entire range of concentrations studied, the  
 186 oxygen content of RPMI-1640 decreased to <5% within 30 min, which is considered to be the  
 187 physiological level of deoxygenation in blood [28].

188 We then prepared 0.1% to 0.5% sodium metabisulphite solutions in cell culture media and mixed  
189 with disease and trait blood samples such that blood is diluted by 20X after mixing (**table S1** and  
190 **figure S3** in supporting information). We recorded real time sickling videos in our smartphone  
191 microscope, and from the extracted frames, determined the instant ( $t_d$ ) at which the first unsickled  
192 RBC in the field of view starts sickling. **Figure 3B** shows how  $t_d$  is measured for the RBC  
193 indicated by the solid black circle, with the first frame in the video taken as the timepoint  $t = 0$   
194 min. RBCs inside the dashed red circles are already sickled, and therefore, are not considered for  
195 this purpose.

196 We then used  $t_d$  as a parameter to compare the sickling behavior of disease and trait RBCs treated  
197 with different sodium metabisulphite concentrations. **Figure 3C** shows how  $t_d$  varies with sodium  
198 metabisulphite concentration for three disease and three trait samples. For disease samples treated  
199 with 0.1%, 0.2% and 0.3% concentrations,  $t_d$  is  $4.1 \text{ min} \pm 0.9 \text{ min}$  (mean  $\pm$  SEM),  $1.7 \pm 0.4 \text{ min}$   
200 and  $1.3 \pm 0.3 \text{ min}$  respectively. The corresponding values for trait samples are  $33.4 \pm 4.8 \text{ min}$ ,  $4.5$   
201  $\pm 1.5 \text{ min}$  and  $2.8 \pm 1.3 \text{ min}$  respectively. Since sickling occurs almost instantaneously at 0.4% and  
202 0.5% concentrations, making it difficult to accurately measure  $t_d$ , these two concentrations were  
203 not considered further.

204 While  $82 \pm 3 \%$  (mean  $\pm$  SEM) of RBCs in disease blood sickle within 30 min when treated with  
205 0.1 % concentration, only  $21 \pm 3\%$  of RBCs in trait blood sickle at this concentration (**figure 3D**).  
206 In contrast, the average number of sickled RBCs in disease and trait blood samples treated with  
207 0.3% sodium metabisulphite for 30 min are  $88 \pm 3 \%$  and  $76 \pm 5\%$  respectively.

208 Therefore, based on the differential sickling response of RBCs in our experiments, we chose 0.1%  
209 and 0.3% as the two sodium metabisulphite concentrations to induce slow and fast deoxygenation  
210 respectively in sickle blood samples. The experiments on quantifying the shape distribution of  
211 RBCs were performed with these two sodium metabisulphite concentrations.

212

### 213 **Deoxygenated healthy, disease and trait blood have characteristic roundness distributions**

214 We treated three samples each of healthy, disease and trait blood with 0.1% and 0.3% sodium  
215 metabisulphite and imaged the RBCs after 30 min. Images of RBCs in the same samples, without  
216 oxygen scavenger, were also captured as negative controls. **Figure 4A** shows snippets of  
217 representative images from healthy, disease and trait blood samples, where the individual RBCs  
218 exhibit a range of shapes (**figure 4B**). The complete raw images from which the snippets are taken  
219 are shown in **figure S4** in the supporting information.

220 Wheelless et al reported form factor ( $FF$ ), given by equation (1), to be the most suitable image  
221 analysis feature to distinguish between sickle RBC shapes after comparing 42 shape descriptors  
222 [12]. As shown in **figure S5** in the supporting information, we found roundness ( $R$ ), given by  
223 equation (2), to be a more accurate measure of RBC shapes in our images when compared to the  
224 form factor.



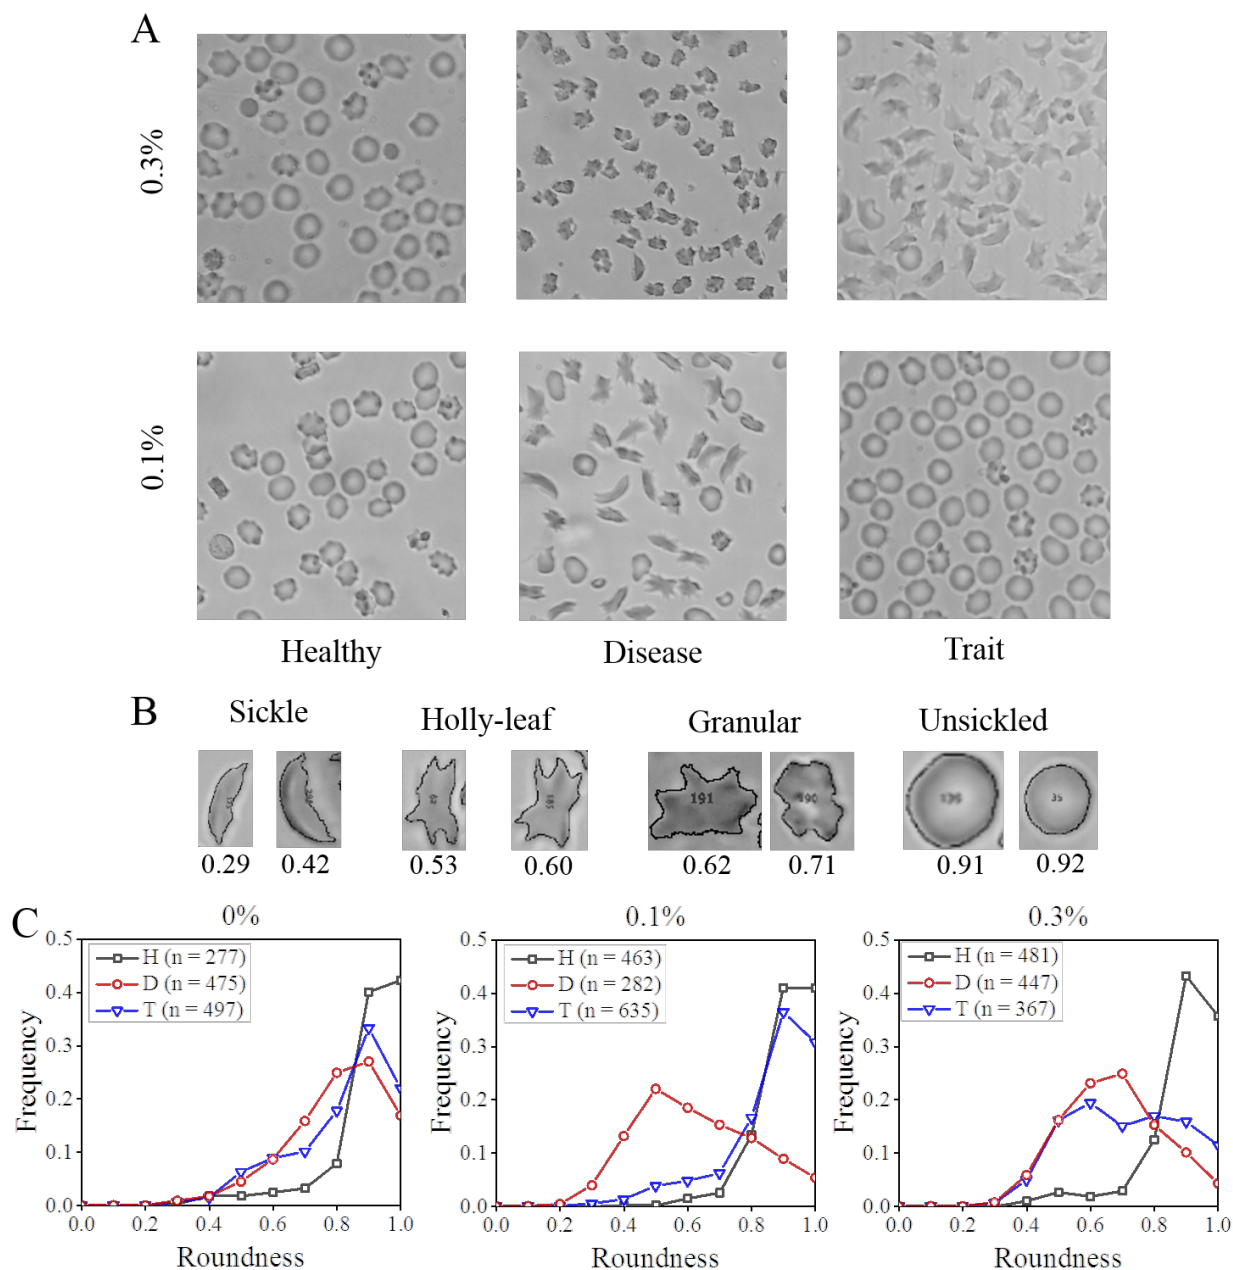

225

226 *Figure 4. Roundness as a shape descriptor for quantifying RBC shapes in healthy and sickle blood. (A)*  
 227 *Snippets of representative images of healthy, disease and trait samples treated with 0.1% and 0.3% sodium*  
 228 *metabisulphite for 30 min are shown. Some crenated RBCs are seen in both the healthy samples and the*  
 229 *trait blood sample treated with 0.1% sodium metabisulphite. (B) Sickle RBCs under hypoxia have a range*  
 230 *of shapes which can be characterized by a roundness value. (C) Roundness distributions of RBCs in healthy*  
 231 *(H; black square), disease (D; red circle) and trait (T; blue triangle) samples treated with 0%, 0.1% and*  
 232 *0.3% sodium metabisulphite respectively are shown. Each distribution is generated by analysing three*  
 233 *different blood samples (N =3) and then pooling the data to see the overall trend. Here, n indicates the*  
 234 *total number of RBCs in three samples used to generate each roundness distribution plot. Each plot is*  
 235 *normalized by dividing it by the number of RBCs (n).*

236 
$$FF = \frac{4 \times \pi \times Area}{Perimeter^2} \quad (1)$$

237

238 
$$R = \frac{4 \times Area}{\pi \times Major\ axis^2} \quad (2)$$

239

240 **Figure 4C** shows the roundness distribution plots of RBCs in healthy (indicated by black square),  
241 disease (red circle) and trait (blue triangle) blood, where each curve has data pooled from three  
242 samples and  $n$  indicates the number of RBCs from these three samples used to generate each  
243 distribution plot. The left panel shows the control distributions in absence of the oxygen scavenger.  
244 The distribution corresponding healthy blood peaks at 1.0 as healthy biconcave RBCs lying flat  
245 inside the imaging chamber appear circular in shape. The distributions for trait and disease samples  
246 peak at 0.9 due to the presence of very few ISCs. The disease distribution has a broader peak  
247 compared to the trait distribution as disease samples have more ISCs than trait samples.

248 The middle panel shows the roundness distributions of blood samples treated with 0.1% sodium  
249 metabisulphite. Healthy RBCs show a peak at 0.9 – 1.0 as these do not sickle when treated with  
250 an oxygen scavenger. Due to a combination of slower deoxygenation and high HbS concentration,  
251 RBCs in disease samples have a mix of sickle, holly leaf and granular shapes (also see **figure 2C**  
252 **and figures S6 and S7** in supporting information), resulting in a broad distribution with a peak at  
253 0.5. As the shapes of most RBCs in trait blood samples treated with 0.1% sodium metabisulphite  
254 remain unchanged owing to fewer nucleation sites, presence of HbAS heterodimers, and slow  
255 deoxygenation, the resulting roundness distribution peaks at 0.9, similar to healthy RBCs.

256 The right panel shows roundness distributions resulting from treatment with 0.3% sodium  
257 metabisulphite. A combination of faster deoxygenation and higher HbS concentration in disease  
258 samples results in granular RBCs, which is reflected in a broad distribution with a peak at 0.7. On  
259 the other hand, owing to faster deoxygenation and lower HbS concentration, RBCs assume holly  
260 leaf shapes in trait samples. This leads to a somewhat bimodal roundness distribution with peaks  
261 at 0.6 and 0.8 respectively. As expected, the distribution for healthy RBCs has a peak at 0.9. The  
262 tails of the distributions for healthy RBCs at lower roundness values in all three panels result from  
263 certain analysis artifacts, as shown in **figure S8** in the supporting information.

264 As RBCs with holly leaf and granular shapes have similar roundness, the roundness distributions  
265 of trait and disease samples treated with 0.3% sodium metabisulphite overlap with each other.  
266 Similarly, the peaks for distributions corresponding to healthy and trait samples treated with 0.1%  
267 sodium metabisulphite overlap. Therefore, the position of the peaks alone is not sufficient  
268 distinguish between these samples.

269

## 270 A shape-based classifier distinguishes between healthy and sickle blood

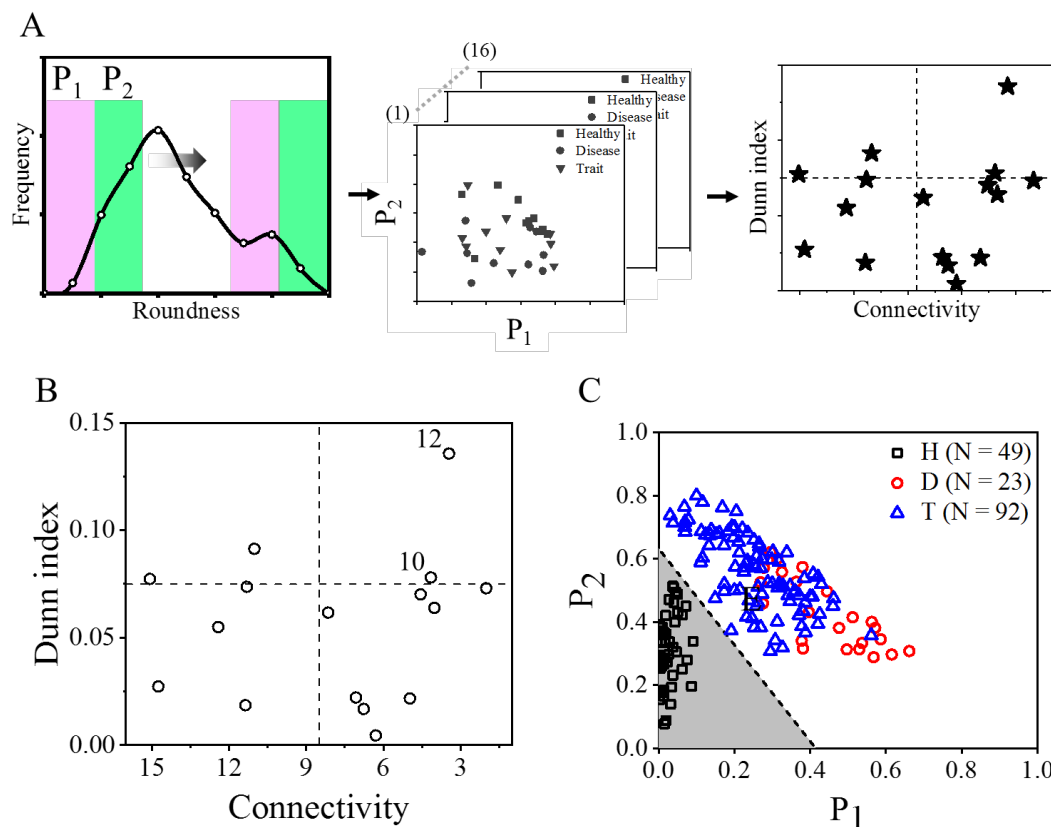

271  
 272 *Figure 5. Derivation of two secondary shape parameters  $P_1$  and  $P_2$  from the roundness distributions. (A)*  
 273 *Schematic diagram describing the process flow to choose a robust combination of  $P_1$  and  $P_2$ . (B) A plot of*  
 274 *Dunn index vs connectivity for 16 unique combinations of  $P_1$  and  $P_2$  corresponding to 164 blood samples.*  
 275 *The top-right quadrant of the plot indicates the most robust combinations (e.g. 10 and 12) with low*  
 276 *connectivity and high Dunn index values. (C) Development of the classifier.  $P_2$  vs  $P_1$  data for 164 distinct*  
 277 *blood samples with known haemoglobin profiles are plotted. Two distinct clusters are seen, one for the*  
 278 *normal samples (HbA), and one for the trait and diseased samples (HbS). The classifier (dotted line)*  
 279 *separates the parameter space into two regions indicated in grey and white.*

280  
 281 We derived two secondary shape parameters  $P_1$  and  $P_2$  from each roundness distribution, using a  
 282 process flow shown schematically in **figure 5A**. We identified two specific areas under each  
 283 roundness distribution curve by placing two contiguous windows of equal width (left panel). We  
 284 called these two areas parameter 1 ( $P_1$ ; violet) and parameter 2 ( $P_2$ ; green) respectively. Each  
 285 roundness distribution is represented as a single point on a plot of  $P_2$  vs  $P_1$ . We then translated the  
 286 pair of windows by increments of 0.1 over the entire range of roundness values, while also varying  
 287 their widths from 0.2 to 0.5, and calculated all sixteen  $P_1 - P_2$  combinations resulting from this  
 288 operation (middle panel). Widths  $<0.2$  were not considered as they would contain information  
 289 about very few RBCs. We then ran a k-means algorithm on each of these 16 datasets to distinguish

290 between healthy and sickle (e.g. disease and trait) clusters. The optimal  $P_1 - P_2$  combination was  
291 identified using connectivity and Dunn index. Connectivity indicated how strongly two clusters  
292 were connected, while Dunn index indicated intra-cluster compactness and inter-cluster separation  
293 [29]. We finally plotted Dunn index vs. connectivity to identify the most robust combination with  
294 low connectivity and high Dunn index (right panel) lying in the top right quadrant of the plot.

295 **Figure 5B** shows a plot of Dunn index vs. connectivity for 16  $P_1 - P_2$  combinations generated  
296 from the roundness distributions of 164 blood samples ( $H = 49$ ,  $D = 23$  and  $T = 92$ ) with known  
297 hemoglobin profiles. The values of the parameters used in this plot are given in **table S2** in the  
298 supporting information. For this experiment, we treated disease samples with 0.1% sodium  
299 metabisulphite as the roundness distributions of disease and trait samples are different at this  
300 concentration. Similarly, both trait and healthy samples were treated with 0.3% sodium  
301 metabisulphite to distinguish them from each other.

302 There are two points in the top right quadrant corresponding to the roundness ranges of 0.2 – 0.8  
303 (combination #10;  $P_1: 0.2 - 0.5$ ;  $P_2: 0.5 - 0.8$ ) and 0.4 – 1.0 (combination #12,  $P_1: 0.4 -$   
304  $0.7$ ;  $P_2: 0.7 - 1.0$ ) respectively that meet the selection criteria. Combination 10 (table S2 in  
305 supporting information) includes information about sickle RBCs with  $0.2 < R < 0.4$  and excludes  
306 information about unsickled RBCs with  $R > 0.8$ . Combination 12, with the highest Dunn index,  
307 lacks information about sickle RBCs with  $R < 0.4$ , but includes information about unsickled RBCs  
308 with  $R > 0.8$ . As combination 10 contains information about RBCs that are physiologically more  
309 relevant to our study, we chose it over combination 12.

310 **Figure 5C** shows the  $P_2$  vs.  $P_1$  plot of 164 known samples corresponding to the first combination.  
311 We used a support vector machine (SVM) model on this dataset to develop a classifier (shown by  
312 the dotted line) that separated healthy and sickle (e.g. disease and trait) blood. A point that lies in  
313 the grey parameter space below the classifier should correspond to a blood sample with unsickled  
314 RBCs, while a point that lies in the white parameter space above the classifier should correspond  
315 to a blood sample with sickled RBCs.

316

### 317 **Distinguishing between disease and trait blood using our classifier**

318 Finally, we validated the classifier with 35 unknown blood samples. **Figure 6(A)** shows the work  
319 flow, where we treat each unknown sample with both 0.1% and 0.3% sodium metabisulphite and  
320 plot the corresponding  $P_1$  and  $P_2$  values (**figure 6B**). We decided upon this work flow because it  
321 is not possible to unambiguously identify an unknown blood sample as healthy, disease or trait by  
322 treating it with just one sodium metabisulphite concentration. As healthy RBCs do not sickle with  
323 either concentration,  $P_1$  and  $P_2$  are low, and the corresponding points (hollow and solid black  
324 squares) lie in the grey region below the classifier. In contrast, more than 80% RBCs in disease  
325 samples sickle when treated with either 0.1% or 0.3% sodium metabisulphite, resulting in high  $P_1$   
326 and  $P_2$  values. Hence, both points (hollow and solid red circles) corresponding to disease samples  
327 lie in the white region above the classifier. As very few RBCs in trait samples sickle when treated  
328 with 0.1% sodium metabisulphite, the corresponding point (solid blue triangle) lies below the

329 classifier. The same trait sample has high  $P_1$  and  $P_2$  values when treated with 0.3% sodium  
 330 metabisulphite. Therefore, the corresponding point (hollow blue triangle) lies above the classifier.

331

332

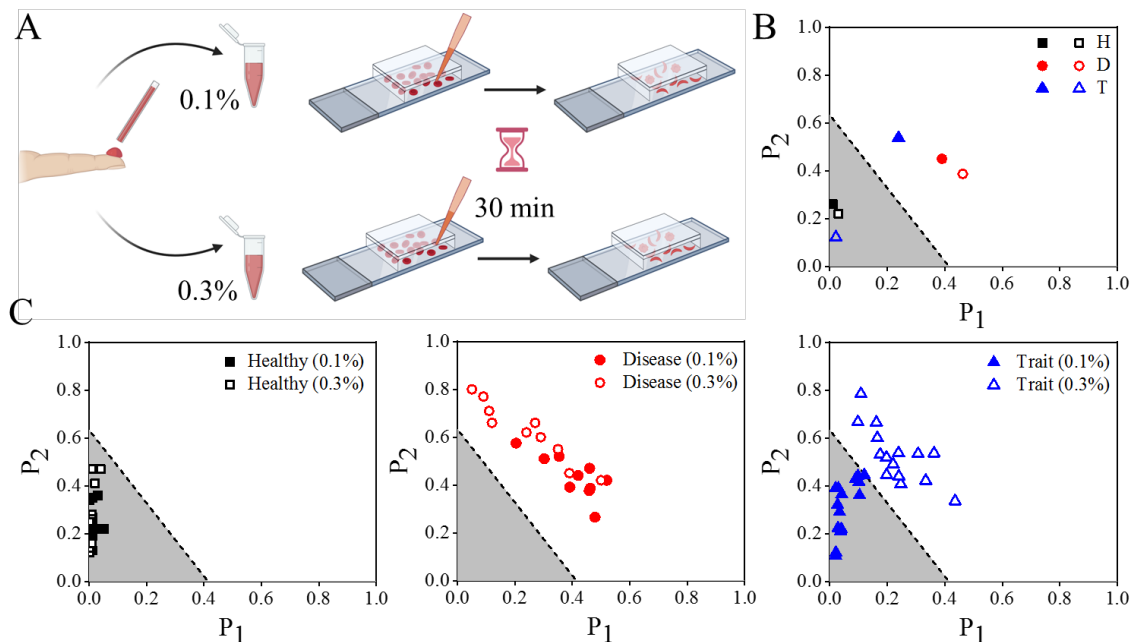

333 *Figure 6. A classification scheme to unambiguously distinguish between disease, trait and healthy blood*  
 334 *samples. (A) Workflow to classify an unknown sample. Each unknown sample is treated with two different*  
 335 *sodium metabisulphite concentrations (0.1% and 0.3%) and imaged after 30 min. (B)  $P_2$  vs.  $P_1$  plots for*  
 336 *healthy, disease and trait samples. Solid and hollow symbols correspond to 0.1% and 0.3% sodium*  
 337 *metabisulphite respectively. For a healthy sample both points lie below the classifier (grey region). For a*  
 338 *disease sample, both points lie above the classifier (white region). For a trait sample, the point*  
 339 *corresponding to 0.1% sodium metabisulphite lies below the classifier, while the point corresponding to*  
 340 *0.3% sodium metabisulphite lies above the classifier. (C) Our technique accurately classified 35 distinct*  
 341 *unknown samples ( $H = 10$ ;  $D = 10$  and  $T = 15$ ) as shown in the three plots.*

342

343 We applied the classification scheme to a pilot study and accurately identified thirty-five unknown  
 344 blood samples ( $H = 10$ ,  $D = 10$  and  $T = 15$ ) from adults and older children, as shown in **figure 6C**.  
 345 We also compared the performance of this classifier with the second classifier (combination 12)  
 346 identified from the connectivity-Dunn index plot. As shown in **Figure S9** in the supporting  
 347 information, this classifier too could accurately identify all 35 unknown samples. This is the first  
 348 proof of concept demonstrating RBC shape as the sole biophysical parameter to distinguish  
 349 between sickle homozygous (disease) and heterozygous (trait) blood samples with high accuracy.  
 350 However, this technique is yet to be validated with other hemoglobin variants or blood samples  
 351 obtained from newborns with high levels of fetal hemoglobin.

352

## 353 **Outlook**

354 It is known that hemoglobin polymerization inside a sickle RBC depends on a number of factors,  
355 such as, the intracellular HbS concentration, whether HbS exists as homodimer or heterodimer, the  
356 presence of other types of hemoglobin (e.g. HbA, HbF, etc.), and the rate of deoxygenation.  
357 Hemoglobin polymerization determines the shapes of sickle RBCs under hypoxia. We postulated  
358 that RBC populations in trait and disease samples have characteristic shape distributions under  
359 different hypoxic conditions, which can be used to distinguish between these two sample types.

360 We devised a way to induce controlled hypoxia in blood samples by treating them with two  
361 different concentrations of a chemical oxygen scavenger (sodium metabisulphite) in a specially  
362 designed microfluidic chamber. RBCs of an unknown blood sample, when treated with high and  
363 low concentrations of sodium metabisulphite for 30 min, led to characteristic shape profiles. By  
364 comparing the profiles of 164 known blood samples, we developed a robust shape-based classifier  
365 and used it to accurately identify 35 unknown blood samples in a proof-of-concept study. The use  
366 of a portable mobile phone microscope and a disposable microfluidic chip makes this method  
367 suitable for confirmed diagnosis of sickle cell disease at the point of care.

368

## 369 **Methods**

370 **Blood samples.** All studies using human blood samples were approved by the Institute Ethics  
371 Committee (IEC), IIT Bombay, with approval numbers IITB-IEC/2016/016, IITB-IEC/2017/020  
372 and IITB-IEC/2018/042. Written informed consent to use leftover blood samples was taken from  
373 all participants. Leftover de-identified blood samples were collected from adults and older children  
374 with a mix of genders during sickle cell screening camps organized by Shirin and Jamshed Guzder  
375 Regional Blood Centre (Valsad, Gujarat) and Dayanand Hospital (Talasari, Maharashtra). The ages  
376 of the participants ranged from 10 to 60 years. We excluded individuals who (i) were under  
377 treatment with folic acid or hydroxyurea, or (ii) received blood transfusion within three months  
378 prior to blood collection. Blood samples from self-reported healthy volunteers from IIT Bombay  
379 and Dayanand Hospital were used as healthy samples during development and validation of the  
380 classifier. All known sickle blood samples (D = 23 and T = 92) were first screened by the hospital  
381 personnel using a standard solubility test. Their hemoglobin profiles were then confirmed using  
382 HPLC to conclusively identify them as disease or trait.

383 **Experiment protocol.** Leftover blood samples were transferred on ice to K3/EDTA-coated  
384 vacutainer tubes, brought to IIT Bombay and stored at 4°C. All tests were performed within 48 h  
385 of blood collection to minimize crenation of the RBCs due to storage. Sodium metabisulphite  
386 solutions were freshly prepared before each experiment due to its shelf life of 3 h. A drop of blood  
387 was added to the sodium metabisulphite solution prepared in cell culture media (RPMI-1640). We  
388 diluted all blood samples by 20X, irrespective of their hematocrit values. The average pH of blood  
389 samples diluted by 20X in 0.1% and 0.3% sodium metabisulphite solution was  $6.05 \pm 0.2$  and  $5.83$   
390  $\pm 0.1$  respectively. A 10  $\mu$ l volume of 20X diluted blood mixed with an appropriate concentration  
391 sodium metabisulphite was introduced into the imaging chamber and the chip was sealed with

392 quick-drying transparent nail lacquer. The chip was then placed on the sample stage of the  
393 smartphone microscope. Images of RBCs were captured at 0 min and 30 min. We also captured  
394 real-time videos of sickling at 30 fps to understand the sickling kinetics. While the ambient  
395 temperature of the lab during imaging ranged from 29°C to 31°C, the temperature during field  
396 testing was found to vary between 25°C and 32°C. High performance liquid chromatography  
397 (HPLC) was performed at Shirin and Jamshed Guzder Regional Blood Centre on all blood samples  
398 to obtain their hemoglobin profiles (HbA, HBA<sub>2</sub>, HbS and HbF).

399 **Image analysis and classification.** Brightfield images of unstained RBCs were analyzed by  
400 ImageJ following a process flow shown in **figure S10** in the supporting information [30]. We  
401 measured roundness and solidity of each RBC and removed those with solidity <0.8 as these  
402 corresponded to partially focused RBCs. Roundness values of remaining ~ 150 - 200 RBCs in the  
403 field of view were binned into 10 groups with 0.1 width to obtain the roundness distribution. Each  
404 distribution was normalized by dividing by the total number of RBCs included in the analysis. We  
405 used R programming language [31] to calculate connectivity and Dunn index for all 16 P<sub>1</sub> and P<sub>2</sub>  
406 combinations. The connectivity was calculated with 10 nearest neighbors. By applying a support  
407 vector machine (SVM) model with a linear kernel and a cost of 10 on the raw data, we obtained a  
408 classifier given by the equation:  $y = -1.527x + 0.633$ .

409

#### 410 **References:**

- [1] G. A. Barabino, M. O. Platt and D. K. Kaul, "Sickle Cell Biomechanics," *Annual Review of Biomedical Engineering*, vol. 12, pp. 345-367, 15 August 2010.
- [2] W. E. Russell, "Is sickle cell anemia a neglected tropical disease?," *PLoS Negl Trop Dis*, vol. 7, no. 5, p. e2120, 2013.
- [3] M. T. Patrick, "Time to invest in sickle cell anemia as a global health priority," *Pediatrics*, vol. 137, no. 6, 2016.
- [4] Y. Alapan, A. Fraiwan, E. Kucukal, M. N. Hasan, R. Ung, M. Kim, I. Odame, J. A. Little and U. A. Gurkan, "Emerging point-of-care technologies for sickle cell disease screening and monitoring," *Expert review of medical devices*, vol. 13, no. 12, pp. 1073--1093, 2016.
- [5] T. N. Williams, "An accurate and affordable test for the rapid diagnosis of sickle cell disease could revolutionize the outlook for affected children born in resource-limited settings," *BMC medicine*, vol. 13, no. 1, p. 238, 2015.
- [6] I. J. Sherman, "The sickling phenomenon, with special reference to the differentiation of sickle cell anemia from the sickle cell trait," *Bull. Johns Hopkins Hosp*, vol. 67, no. 309, p. 19, 1940.
- [7] G. A. Daland and W. B. Castle, "A simple and rapid method for demonstrating sickling of the red blood cells: the use of reducing agents," *The Journal of laboratory and clinical medicine*, vol. 3, no. 9, pp. 1082--1088, 1948.
- [8] H. A. Itano and L. Pauling, "A rapid diagnostic test for sickle cell anemia," *Blood*, vol. 4, no. 1, pp. 66-68, 1949.
- [9] L. Pauling, H. A. Itano, S. J. Singer and I. C. Wells, "Sickle cell anemia, a molecular disease," *Science*, vol. 110, no. 2865, pp. 543-548, 1949.
- [10] K. Horiuchi, S. K. Ballas and T. Asakura, "The effect of deoxygenation rate on the formation of irreversibly sickled cells," *Blood*, vol. 71, no. 1, pp. 46-51, 1988.

- [11] K. Horiuchi, J. Ohata, Y. Hirano and T. Asakura, "Morphologic studies of sickle erythrocytes by image analysis," *The Journal of Laboratory and Clinical Medicine*, vol. 115, no. 5, pp. 613-620, 01 May 1990.
- [12] L. L. Wheelless, R. D. Robinson, O. P. Lapets, C. Cox, A. Rubio, M. Weintraub and L. J. Benjamin, "Classification of red blood cells as normal, sickle, or other abnormal, using a single image analysis feature," *Cytometry: The Journal of the International Society for Analytical Cytology*, vol. 17, no. 2, pp. 159-166, 1994.
- [13] T. Asakura, K. Asakura, K. Obata, J. Mattiello and S. K. Ballas, "Blood samples collected under venous oxygen pressure from patients with sickle cell disease contain a significant number of a new type of reversibly sickled cells: Constancy of the percentage of sickled cells in individual patients during steady state," *American journal of hematology*, vol. 80, no. 4, pp. 249-256, 2005.
- [14] D. K. Das, C. Chakraborty, B. Mitra, A. K. Maiti and A. K. Ray, "Quantitative microscopy approach for shape-based erythrocytes characterization in anaemia," *Journal of microscopy*, vol. 249, no. 2, pp. 136-149, 2013.
- [15] J. Jung, L. E. Matemba, K. Lee, P. E. Kazyoba, J. Yoon, J. J. Massaga, K. Kim, D.-J. Kim and Y. Park, "Optical characterization of red blood cells from individuals with sickle cell trait and disease in Tanzania using quantitative phase imaging," *Scientific reports*, vol. 6, no. 31698, pp. 1-9, 2016.
- [16] X. Gual-Arnau, S. Herold-García and A. Simó, "Erythrocyte shape classification using integral-geometry-based methods," *Medical & biological engineering & computing*, vol. 53, no. 7, pp. 623-633, 2015.
- [17] W. Delgado-Font, M. Escobedo-Nicot, M. González-Hidalgo, S. Herold-Garcia and A. Jaume-i-Capó, "Diagnosis support of sickle cell anemia by classifying red blood cell shape in peripheral blood images," *Medical & biological engineering & computing*, vol. 58, no. 6, pp. 1265-1284, 2020.
- [18] N. Praljak, S. Iram, U. Goreke, G. Singh, A. Hill, U. A. Gurkan and M. Hinczewski, "Integrating deep learning with microfluidics for biophysical classification of sickle red blood cells," *bioRxiv*, 2020.
- [19] B. Javidi, A. Markman, S. Rawat, T. O'Connor, A. Anand and B. Andemariam, "Sickle cell disease diagnosis based on spatio-temporal cell dynamics analysis using 3D printed shearing digital holographic microscopy," *Optics Express*, vol. 26, no. 10, pp. 13614-13627, 2018.
- [20] K. de Haan, H. C. Koydemir, Y. Rivenson, D. Tseng, E. Van Dyne, L. Bakic, D. Karınca, K. Liang, M. Ilango, E. Gumustekin and A. Ozcan, "Automated screening of sickle cells using a smartphone-based microscope and deep learning," *NPJ Digital Medicine*, vol. 3, no. 1, pp. 1-9, 2020.
- [21] W. A. Eaton and J. Hofrichter, "Hemoglobin S gelation and sickle cell disease," *Blood*, vol. 70, no. 5, pp. 1245-1266, 1987.
- [22] W. E. Mickols, J. D. Corbett, M. F. Maestre, I. Tinoco, J. Kropp and S. H. Embury, "The effect of speed of deoxygenation on the percentage of aligned hemoglobin in sickle cells. Application of differential polarization microscopy," *Journal of Biological Chemistry*, vol. 263, no. 9, pp. 4338-4346, 1988.
- [23] J. D. Corbett, W. E. Mickols and M. F. Maestre, "Effect of hemoglobin concentration on nucleation and polymer formation in sickle red blood cells," *Journal of biological chemistry*, vol. 270, no. 6, pp. 2708-2715, 1995.
- [24] K. D. Pagana and T. J. Pagana, *Mosby's Manual of Diagnostic and Laboratory Tests-E-Book*, Elsevier Health Sciences, 2017.
- [25] F. A. Ferrone, J. Hofrichter and W. A. Eaton, "Kinetics of sickle hemoglobin polymerization: II. A double nucleation mechanism," *Journal of molecular biology*, vol. 183, no. 4, pp. 611-631, 1985.
- [26] W. A. Eaton and J. Hofrichter, "Sickle cell hemoglobin polymerization," in *Advances in protein chemistry*, vol. 40, C. B. Anfinsen, J. T. Edsall, F. M. Richards and D. S. Eisenberg, Eds., Elsevier, 1990, pp. 63-279.



- [27] M. Rotter, D. Yosmanovich, R. W. Briehl, S. Kwong and F. A. Ferrone, "Nucleation of sickle hemoglobin mixed with hemoglobin A: experimental and theoretical studies of hybrid-forming mixtures," *Biophysical Journal*, vol. 101, no. 11, pp. 2790-2797, 2011.
- [28] J. M. Higgins, D. T. Eddington, S. N. Bhatia and L. Mahadevan, "Sickle cell vasoocclusion and rescue in a microfluidic device," *Proceedings of the National Academy of Sciences*, vol. 104, no. 51, pp. 20496-20500, 2007.
- [29] J. Handl, J. Knowles and D. B. Kell, "Computational cluster validation in post-genomic data analysis," *Bioinformatics*, vol. 21, no. 15, pp. 3201-3212, 2005.
- [30] C. A. Schneider, W. S. Rasband and K. W. Eliceiri, "NIH Image to ImageJ: 25 years of image analysis," *Nature methods*, vol. 9, no. 7, pp. 671-675, 2012.
- [31] R Core Team, "R: A language and environment for statistical computing," R Foundation for Statistical Computing, Vienna, Austria, 2013.
- [32] J. V. Neel, "The inheritance of sickle cell anemia," *Science*, vol. 110, no. 2846, pp. 64-66, 1949.
- [33] X. Lu, A. Chaudhury, J. M. Higgins and D. K. Wood, "Oxygen-dependent flow of sickle trait blood as an in vitro therapeutic benchmark for sickle cell disease treatments," *American journal of hematology*, vol. 93, no. 10, pp. 1227-1235, 2018.
- [34] X. Lu, D. K. Wood and J. M. Higgins, "Deoxygenation reduces sickle cell blood flow at arterial oxygen tension," *Biophysical journal*, vol. 110, no. 12, pp. 2751-2758, 2016.
- [35] J. C. Dunn, "Well-separated clusters and optimal fuzzy partitions," *Journal of cybernetics*, vol. 4, no. 1, pp. 95-104, 1974.

411

412

413 **Acknowledgements**

414 The authors would like to thank Dr. Yazdi Italia, Sister Lavina, Sister Molly, Sister Monica, Mr.  
415 Bhavesh Raicha, Mr. Manoj Parekh, the staff at Shirin and Jamshed Guzder Regional Blood Centre  
416 (Valsad), and the staff at Dayanand Hospital (Talasari) for use of leftover blood samples and  
417 sharing of de-identified HPLC results. They acknowledge Dr. G. Nageshwara Rao, Dr. Kanjaksha  
418 Ghosh, Dr. Roshan Colah, Dr. Malay Mukherjee and Dr. Manisha Madkaikar for technical  
419 discussions, Dr. Santosh Noronha for use of dissolved oxygen meter, and Mr. Devendra Dhaka,  
420 Mr. Binil Jacob, Mr. Siddhant Jaitpal and Mr. Santosh Jinnawar for other technical and logistical  
421 support to the project. This project was supported by a Grand Challenges Explorations (phase 1)  
422 grant from Bill and Melinda Gates Foundation through their IKP-GCE program and a translation  
423 grant from Tata Centre for Technology and Design (TCTD), Indian Institute of Technology  
424 Bombay. R.M. and A.M. received salary support from a grant funded by the Wadhvani Research  
425 Centre for Bioengineering (WRCB), Indian Institute of Technology Bombay. The authors are  
426 grateful to Dr. Shamik Sen, Dr. Anirban Sain and Dr. Suchita Nath-Sain for their critical feedback  
427 on the manuscript. Parts of figures 1, 2 and 6 were created with BioRender.com.

428

429 **Author contributions**

430 C.D., O.S., R.M., M.S., S., P.G. and D.P. designed research. C.D., O.S., R.M., M.S., S., S.S., A.M.,  
431 P.G., N.M., and S.S. performed research. C.D., O.S., R.M., S.S., A.M., P.G., S.S. and D.P. analyzed  
432 data. R.M., C.D., O.S., P.G. and D.P. wrote the paper.

433

434

## Supporting information

435

### 436 1. Optimizing the microfluidic chip height

437

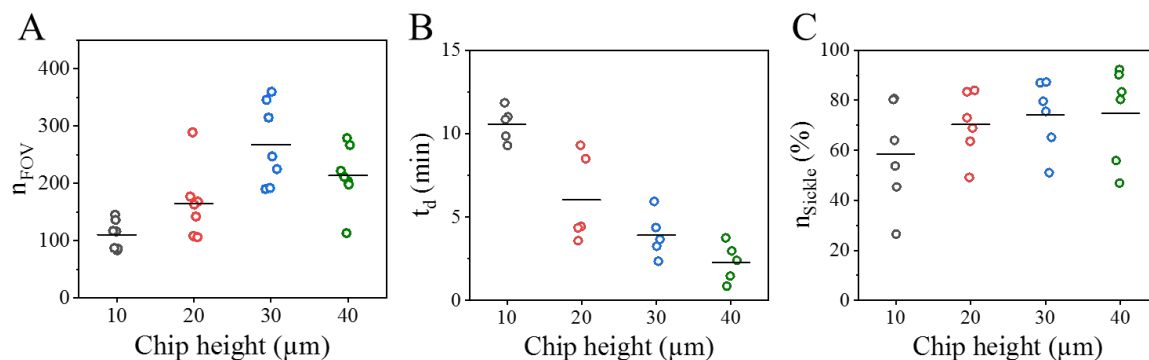

438

439 *Figure S1: Optimization of the height of the microfluidic chamber. (A) Number of healthy RBCs in*  
440 *the field of view ( $n_{FOV}$ ) inside imaging chambers of different heights. The line indicates the mean*  
441 *value ( $n = 7$ ). (B) The time taken ( $t_d$ ) for the first RBC in the field of view to start sickling inside*  
442 *chips of different heights ( $N = 6$ ). (C) The percentage of sickle cells ( $n_{sickle}$ ) at  $t = 30$  min inside*  
443 *chips of different heights ( $N = 6$ ).*

444

445 The material of the microfluidic imaging chamber must be impermeable to oxygen and have good  
446 optical properties for imaging unstained sickled RBCs. As shown in **figure 1B**, we made 10 mm  
447 × 22 mm microfluidic imaging chambers in glass. We used commercial double-coated thin  
448 adhesive films of specific thicknesses as spacers to define the chamber height. We explored  
449 chamber heights of 10 μm, 20 μm, 30 μm, 40 μm, 80 μm and 100 μm, and tested these chips by  
450 imaging healthy blood samples. Fabricated devices were not used when (i) an irregular diffraction  
451 pattern was observed indicating non-uniform thickness, (ii) introducing the sample into the  
452 chamber by capillary action was difficult, (iii) air bubbles remained trapped after loading blood  
453 and sealing the chip, or (iv) significant crenation occurred in RBCs immediately after loading.

454 While choosing the most optimal chip height, we need to ensure that (i) we avoid shear stress to  
455 RBCs while trying to fill a chamber with a very small height and (ii) that the RBCs have enough  
456 room to sickle inside the microfluidic chip. We noticed that an increase in the microfluidic  
457 confinement by reducing the chamber height increased crenation of healthy RBCs. While an  
458 increased device height reduced crenation and promoted free sickling, it led to stacking of RBCs.  
459 Therefore, we performed subsequent experiments with chips of height 10, 20 30 and 40 μm.

460 **Figure S1(left panel)** shows the number of RBCs counted in the field of view ( $n_{FOV}$ ) inside  
461 chambers of height 10 μm, 20 μm, 30 μm and 40 μm. Considerably fewer RBCs are counted in

462 10  $\mu\text{m}$  ( $110 \pm 10$ ; mean  $\pm$  SEM) and 20  $\mu\text{m}$  ( $165 \pm 23$ ) high chambers. In contrast, the image  
463 processing algorithm detects more than 200 RBCs in the field of view inside chambers of 30  $\mu\text{m}$   
464 ( $268 \pm 27$ ) and 40  $\mu\text{m}$  ( $213 \pm 21$ ) heights. The number of RBCs detected inside the chamber  
465 increases with an increase in the chamber height. As there are more densely packed RBCs inside  
466 a 40  $\mu\text{m}$  high chip, these are eliminated as clusters by the image processing algorithm. This results  
467 in a decrease in the number of RBCs counted by the algorithm inside the 40  $\mu\text{m}$  high chip.

468 As shown in **figure S1 (middle panel)**, we treated six sickle cell disease blood samples with 0.1%  
469 sodium metabisulphite. From the real time videos of sickling, we measured the time ( $t_d$ ) it takes  
470 for the first RBC to sickle inside imaging chambers of different heights. The values of  $t_d$  are  $10.6$   
471  $\pm 0.5$  min (mean  $\pm$  SEM),  $6.0 \pm 1.2$  min,  $3.9 \pm 0.6$  min and  $2.3 \pm 0.5$  min for chip heights of 10,  
472 20, 30 and 40  $\mu\text{m}$  respectively. We also measured the percentage of sickled RBCs ( $n_{sickle}$ ) at  $t =$   
473 30 min inside chips of different heights. As shown in **figure S1 (right panel)**, the mean value of  
474  $n_{sickle}$  ranged from 58% to 75% with a large variability in the data.

475 We found that RBCs inside a 30  $\mu\text{m}$  high chip do not crenate much and sickle relatively fast ( $t_d =$   
476  $3.9 \pm 0.6$  min). On an average, there are  $> 250$  RBCs in the field of view in the 30  $\mu\text{m}$  high chip.  
477 Therefore, all further experiments in this study were conducted inside 30  $\mu\text{m}$  high chips.

478

## 479 2. Design and development of an inverted portable smartphone microscope

480 We designed and developed a single-objective inverted transmission microscope to capture images  
481 of unstained RBCs suspended in liquid media and record their sickling kinetics in real time at low-  
482 resource settings. **Figure S2(A)** shows a photo of the smartphone microscope. The user can rotate  
483 the phone holder by any angle from  $0^\circ$  to  $90^\circ$  for comfortable viewing, while keeping the image in  
484 focus. We designed and 3D-printed two kinds of holders to accommodate Xiaomi Mi3 and  
485 Samsung A10 phone models. The smartphone can be easily detached from the holder by the user  
486 when the microscope is not being used.

487 **Figure S2(B)** shows the exploded view of the mechanical assembly. A microscope slide or a  
488 microfluidic chip is placed on the sample stage. The sample stage is attached to a second stage  
489 (called “Z-movement stage” in our diagram) capable of vertical movement.

490 This arrangement allows us to move the sample stage up or down by turning the focusing knob.  
491 Therefore, the sample stage, and not the objective, is moved while focusing the image in our design.  
492 The focusing knob has a pitch of 0.25 mm. The Z-movement stage is fixed to the base plate of the  
493 microscope. The entire focusing arrangement and the base plate are made of aluminium to make  
494 the microscope stable. The base plate also supports another metallic vertical arm containing the  
495 objective lens holder. A key feature of the mechanical system of our microscope is the presence of  
496 a 3D-printed rotating arm containing the optical components and the smartphone holder. This arm  
497 can be rotated by any angle from  $0^\circ$  to  $90^\circ$  to change the viewing angle of the smartphone. The  
498 outer casing of the microscope is 3D-printed in PLA.

499 **Figure S2(C)** shows the optical components, while **figure S2(D)** shows the light path. A 1W white  
500 LED, fitted with a collimating lens, acts as the illumination source. The light transmitted from the  
501 microfluidic chip passes through a 40X (0.65 NA) air objective and falls on a right-angled prism  
502 (prism #1 in the figure), which bends the beam by 90°. Another right-angled prism (prism #2 in  
503 the figure) bends the beam by another 90° such that it falls on an eye-piece lens with 15X  
504 magnification. A total magnification of 600X (using a 40X objective and a 15X eye-piece) is  
505 achieved in our microscope over a tube length of 160 mm.

506

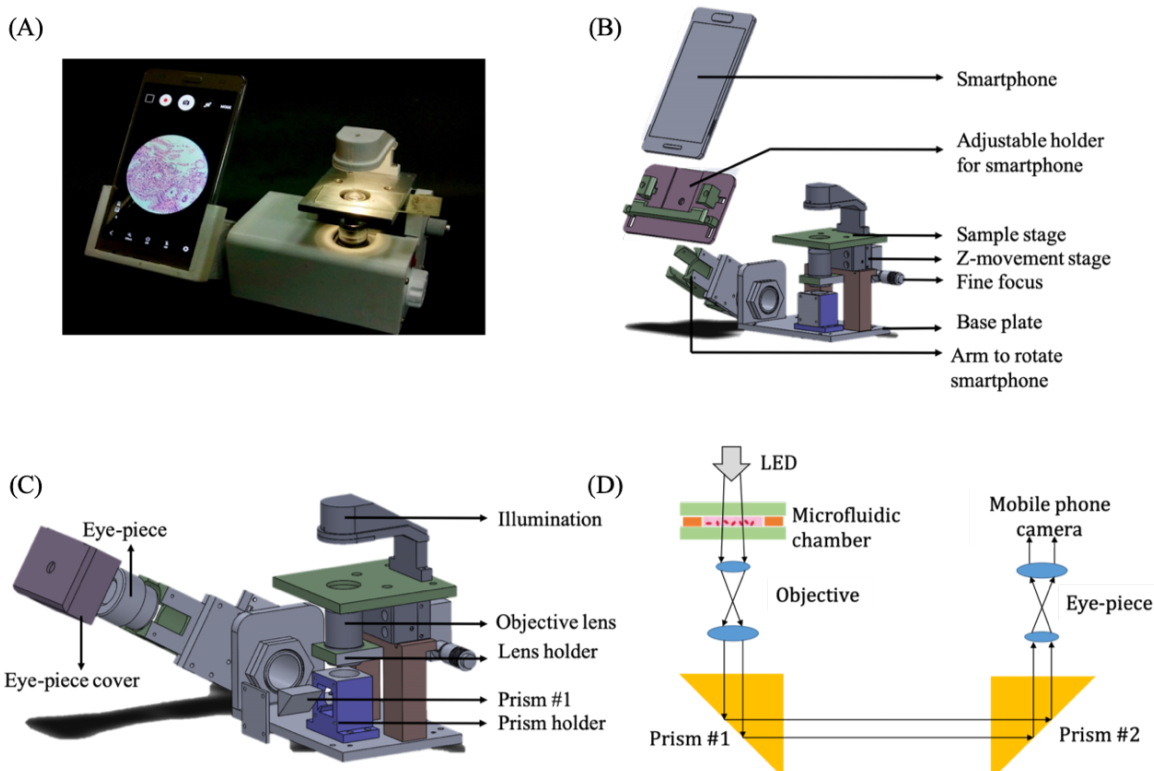

507

508 *Figure S2. An inverted single-objective portable smartphone microscope. (A) A photo of the*  
509 *microscope is shown. (B) Exploded 3D schematic of the mechanical parts of the microscope*  
510 *showing the sample and the Z-movement stages, the phone holder, the focusing knob, and the*  
511 *rotating arm. (C) Exploded 3D schematic of the optical system of the microscope showing the*  
512 *source and various lenses and prisms. (D) Ray diagram showing the light path inside the*  
513 *microscope.*

514

515 The system of two prisms makes the microscope design compact. The rotating arm contains the  
516 second prism, the eye-piece and the mobile phone holder. The rotating arm is mounted in such a  
517 way that (i) the incident surface of the second prism always remains parallel to the emitting surface  
518 of the first prism during rotation, and (ii) the emitting surface of the second prism remains parallel  
519 to the eye-piece. The arm rotates in a plane orthogonal to the beam connecting the two prisms. The

520 3D-printed smartphone holder is detachable and we customized it to the specific mobile phone  
521 models. We used a 3D printed PLA cover for the eye-piece to have a fixed distance between the  
522 eye-piece and the smartphone camera such that a sharp and focused image forms on the phone  
523 screen. The smartphone holder slides onto a slot on the eye-piece cover and keeps the camera in  
524 perfect alignment with the rest of the optical system.

525

### 526 3. Deoxygenation rate depends on oxygen scavenger concentration

527 We plotted the dissolved oxygen concentration as a function of time for different sodium  
528 metabisulphite concentrations (**figure 3A** in the manuscript). We fitted each plot to an equation of  
529 the functional form  $y = Ae^{-\frac{x}{\tau}} + B$ , where  $y$  indicates the dissolved oxygen content (%) and  $x$   
530 indicates time (min). **Table S1** shows the fitting parameters for each concentration.

531

*Table S1: Fitting parameters to extract the decay time constant ( $\tau$ ) describing the decrease in dissolved oxygen present in RPMI-1640 for different concentrations of the oxygen scavenger sodium metabisulphite.*

| <i>Sodium metabisulphite</i> | 0.1%  | 0.2%  | 0.3%  | 0.4%  | 0.5% |
|------------------------------|-------|-------|-------|-------|------|
| <i>A</i>                     | 112.5 | 117.1 | 106.6 | 100.7 | 99.6 |
| <i>B</i>                     | - 7.2 | - 4.5 | - 0.9 | 0.2   | 0.8  |
| $\tau$ (min)                 | 12.2  | 9.3   | 6.1   | 3.5   | 1.6  |

532

533

### 534 4. Choice of diluent and dilution factor

535 The buffer used to dilute blood must keep RBCs under minimal osmotic stress to avoid crenation,  
536 while the dilution factor should ensure that there is an adequate number of RBCs in the field of  
537 view. We first diluted healthy RBCs using 0.9% normal saline (NS), 5% dextrose, 1X phosphate  
538 buffered saline (PBS) and cell culture media (RPMI-1640). 5% dextrose led to clumping of healthy  
539 RBCs and was discarded. Next, sodium metabisulfite solutions of appropriate concentrations as  
540 discussed in the manuscript were prepared in NS, PBS and RPMI-1640 and were added to whole  
541 blood from trait and disease patients. Compared to RPMI-1640, sickling in PBS and normal saline  
542 took 2-3 times longer. Therefore, we continued our study with RPMI-1640 as the diluent.

543 The dilution was adjusted in such a way that the cells do not form stacks in the imaging chamber.  
544 As seen in **figure S3**, whole blood showed strong rouleaux formation. There were too many RBCs  
545 present in the field of view with 5X diluted blood, making it difficult for the image processing  
546 program to identify individual RBCs. The cells were sparsely distributed for 20X and 40X

547 dilutions. However, there were too few cells in the field of view when blood was diluted by 40X,  
548 60X or 100X. Dilutions higher than 40X also showed an increase in crenation. Therefore, we  
549 decided to continue our experiments with 20X dilution.

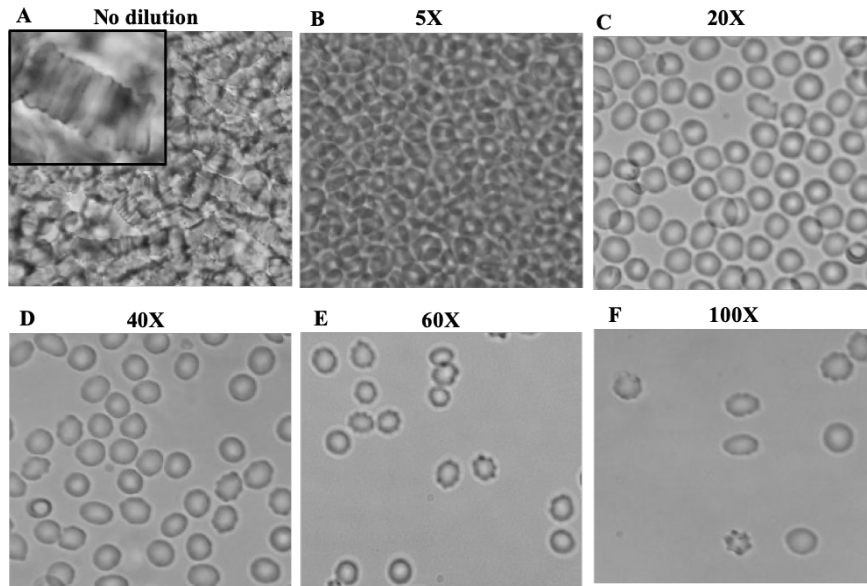

550

551 *Figure S3. Images of RBCs with different dilutions. (A) Strong rouleaux formation is seen with*  
552 *undiluted blood. (B) There are too many RBCs at 5X dilution, making it difficult for an image*  
553 *processing program to distinguish individual cells. (C) A dilution of 20X gives a sufficient number*  
554 *of cells in the field of view. (D – F) Dilutions of 40X, 60X and 100X lead to very few cells in the*  
555 *field of view, making it difficult to obtain reliable statistical data.*

556

557

558

559 **5. Raw images of disease, trait and healthy samples treated with sodium metabisulphite for**  
560 **30 min**

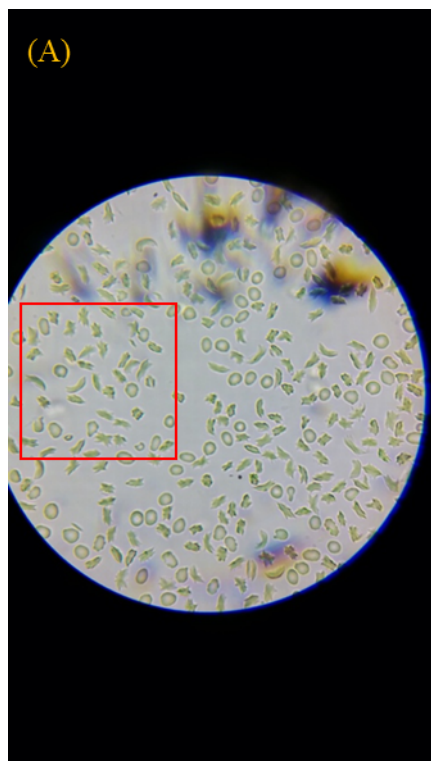

Filename: D126\_0.1\_30min\_20170106\_212209

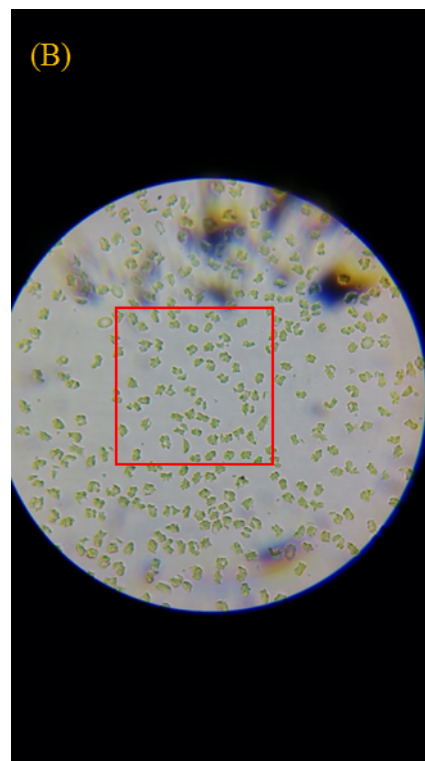

Filename: D126\_0.3\_30min\_20170106\_221552

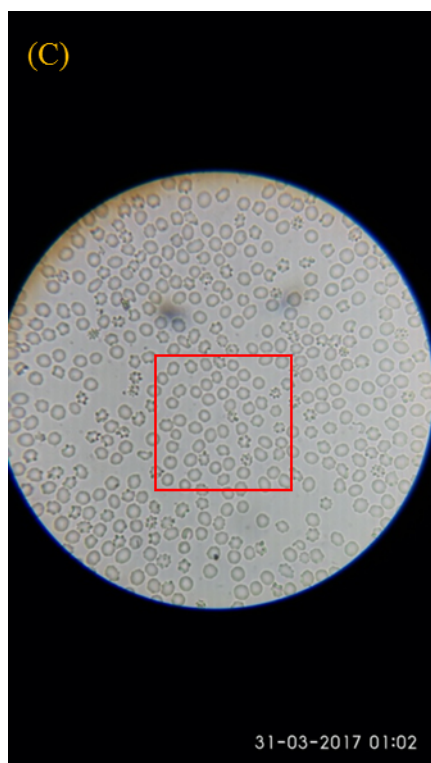

Filename: T163\_0.1\_30min\_20170331\_010215

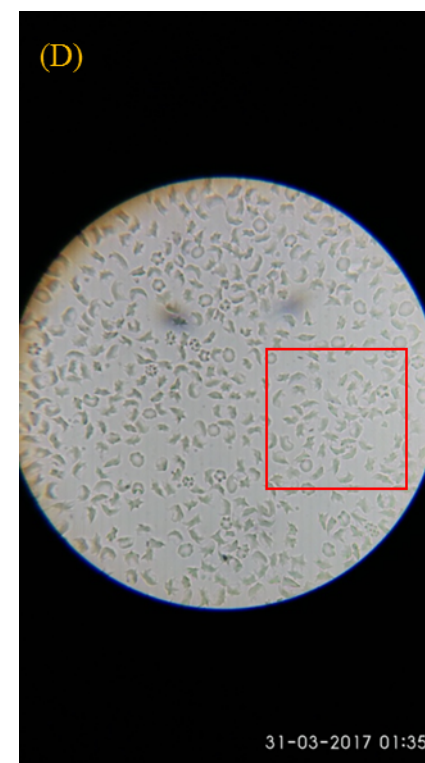

Filename: T163\_0.3\_30min\_20170331\_013525



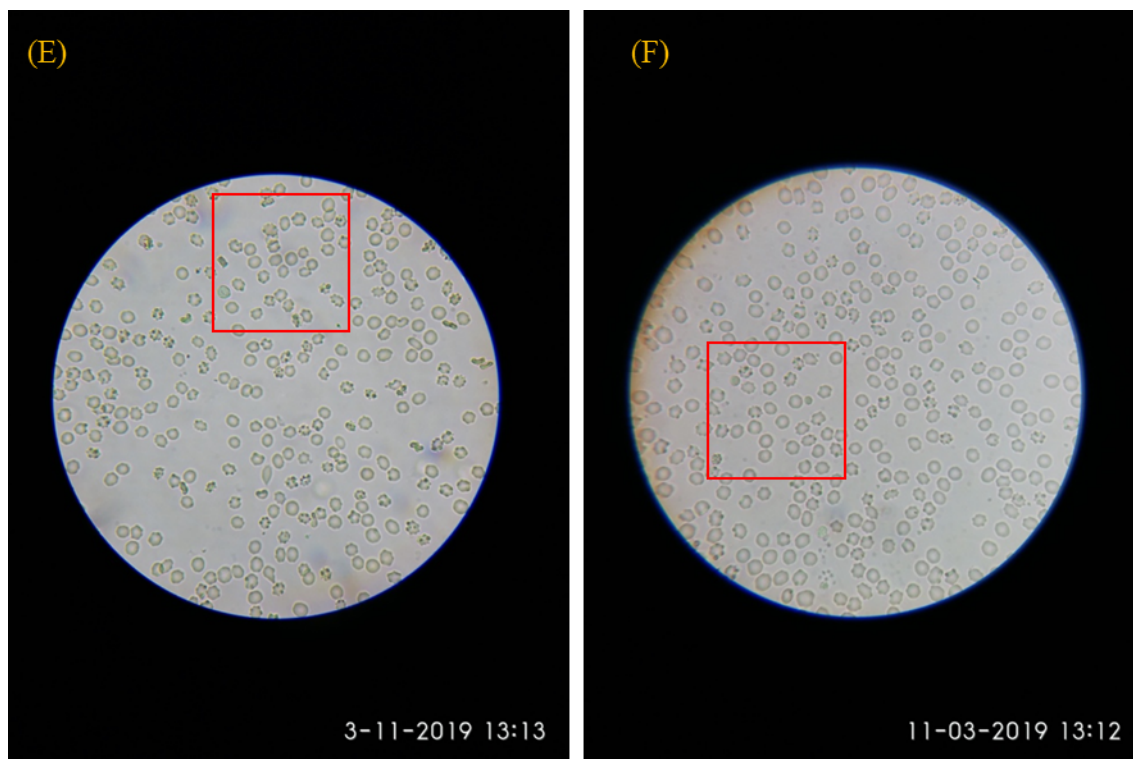

Filename: N07\_0.1\_30min\_20190311\_131331      Filename: N07\_0.3\_30min\_20190311\_131210

562 *Figure S4. Raw images of disease (A and B), trait (C and D) and healthy (E and F) samples treated*  
563 *with 0.1% (left column) and 0.3% (right column) sodium metabisulphite respectively. The red*  
564 *rectangles show the areas from which snippets were taken for figure 4A.*

565

566 Figure S4 shows some representative raw images of disease, trait and healthy blood samples. The  
567 red rectangles show the areas that were used as snippets in figure 4 of the manuscript.

568

## 569 **6. Choosing roundness (R) over form factor (FF) to characterize RBC shapes**

570 We explored both roundness and form factor for characterising individual RBC shapes in our study.  
571 We imaged healthy blood samples and measured both these parameters using ImageJ for RBCs  
572 that are very close to circular in shape. Note that the parameter ‘form factor (FF) reported by  
573 Wheelless and others [12] is the same as the parameter ‘circularity’ (C) measured by ImageJ. As  
574 shown by equations (1) and (2), both R and FF range from 0 for elongated objects to 1 for perfect  
575 circles.

$$576 \quad FF = \frac{4 \times \pi \times Area}{Perimeter^2} \quad (1)$$

$$577 \quad R = \frac{4 \times Area}{\pi \times Major\ axis^2} \quad (2)$$



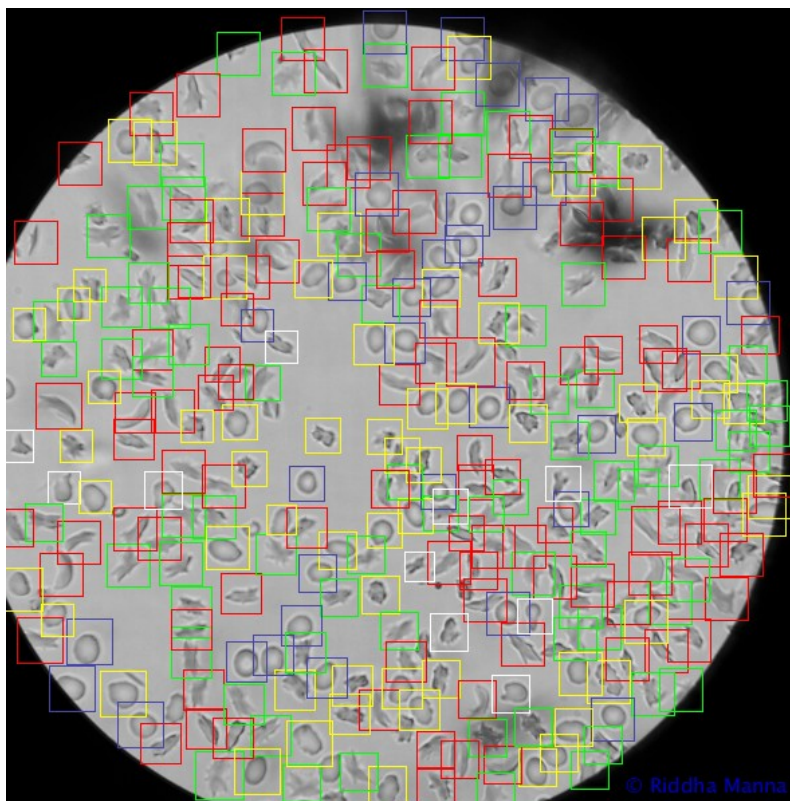

600

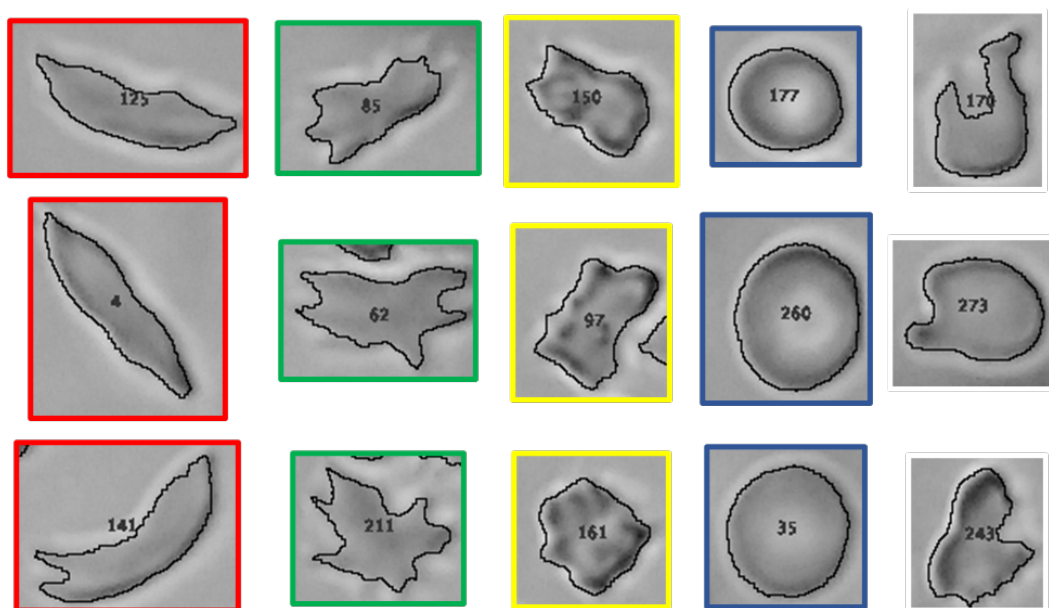

601

602 *Figure S6. Image of the disease sample (D126) shown in figure S4(A) after manual annotation by*  
603 *an experienced user. We see sickle (red rectangles), holly leaf (green rectangles), granular (yellow*  
604 *rectangles), unsickled (blue rectangles) and uncategorized (white rectangles) RBCs. Three*  
605 *examples of each cell type are shown separately below the image.*

606

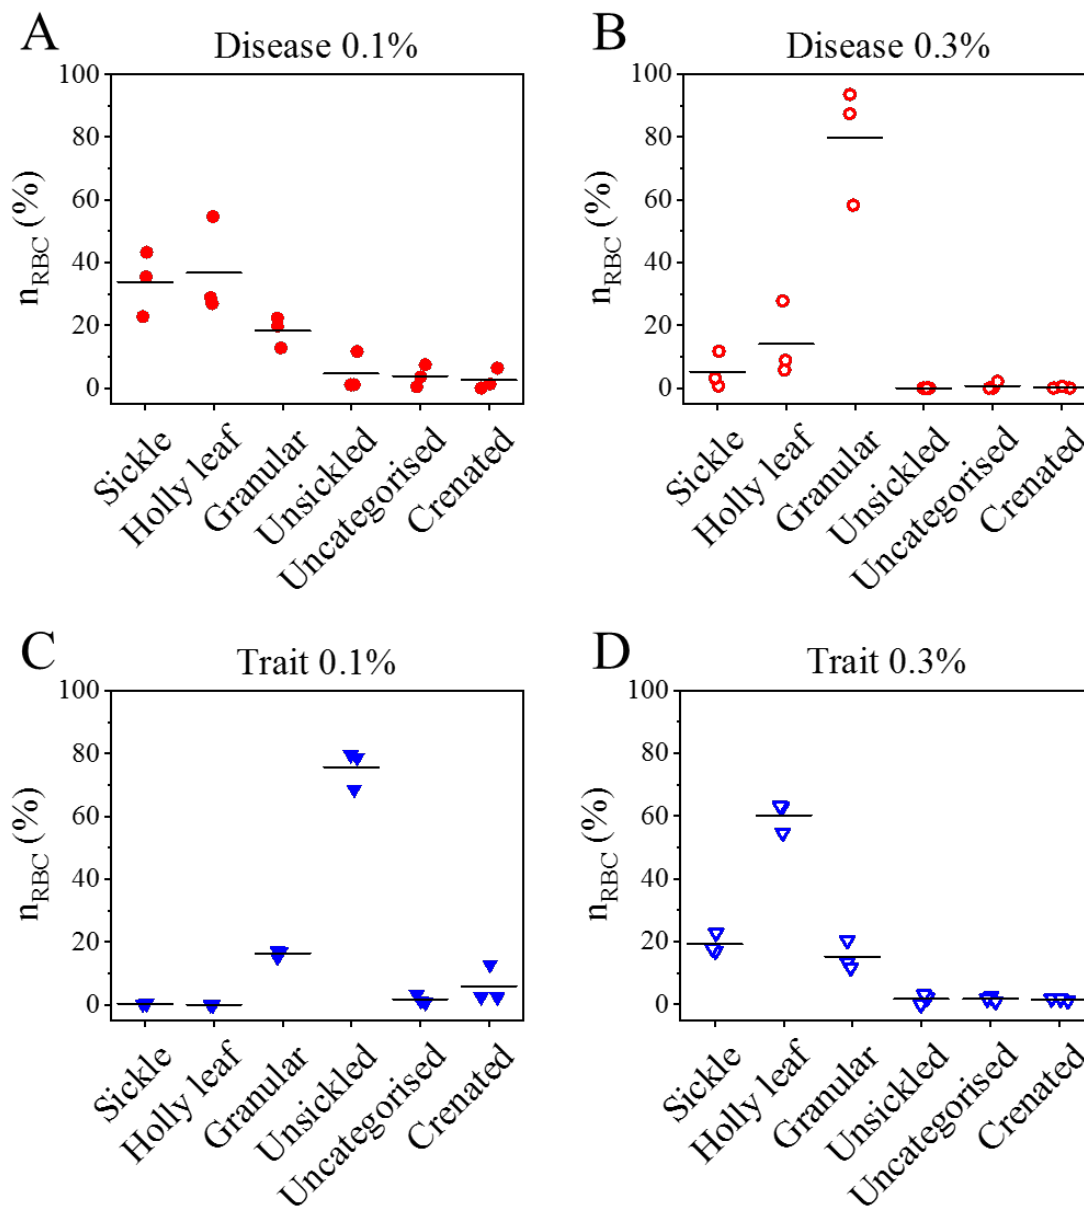

607 *Figure S7. Distribution of RBC shapes in deoxygenated disease ( $N = 3$ ) and trait ( $N = 3$ ) samples.*  
 608 *(A, B) Disease samples treated with 0.1% and 0.3% sodium metabisulphite. (C, D) Trait samples*  
 609 *treated with 0.1% and 0.3% sodium metabisulphite. The horizontal lines indicate the mean values.*

610

611 We manually annotated and counted the RBCs in three disease and three trait samples, each treated  
 612 with 0.1% and 0.3% sodium metabisulphite. **Figure S7** shows the number of RBCs of each type  
 613 in each of these samples. We note that disease samples treated with 0.1% sodium metabisulphite  
 614 have primarily a mix of sickle ( $34 \pm 6\%$ ; mean  $\pm$  SEM), holly leaf ( $37 \pm 9\%$ ) and granular ( $18 \pm$   
 615  $3\%$ ) RBCs. The same samples, when treated with 0.3% concentration, have on an average ( $80 \pm$   
 616  $11\%$ ) granular and ( $14 \pm 7\%$ ) holly leaf RBCs. Trait samples treated with 0.1% metabisulphite

617 have ( $76 \pm 4\%$ ) unsickled RBCs. These samples have ( $19 \pm 2\%$ ) sickle, ( $60 \pm 3\%$ ) holly leaf and  
618 ( $15 \pm 3\%$ ) granular RBCs when treated with 0.3% metabisulphite concentration.

619

## 620 8. Image artifacts in healthy blood samples leading to tails in roundness distributions

621 **Figure 4C** of the manuscript shows that the roundness distributions of healthy samples have tails  
622 at values of  $R < 0.8$ . As shown in **figure S8**, this is due to the presence of specific artifacts such as  
623 RBCs lying sideways (left panel), crenated RBCs (middle panel) or two or more RBCs overlapping  
624 in such a way that the area and solidity filters cannot exclude them (right panel). Our area filter,  
625 described in section 11 of the supporting information, is chosen to ensure that most sickle cells,  
626 which are somewhat larger in area compared to healthy biconcave RBCs, are included in our  
627 analysis. This area filter cannot exclude these artifacts when dealing with healthy blood samples.  
628 However, the presence of the artifacts do not affect our workflow as seen from the data presented  
629 in **figure 5** and **figure 6** of the manuscript.

630

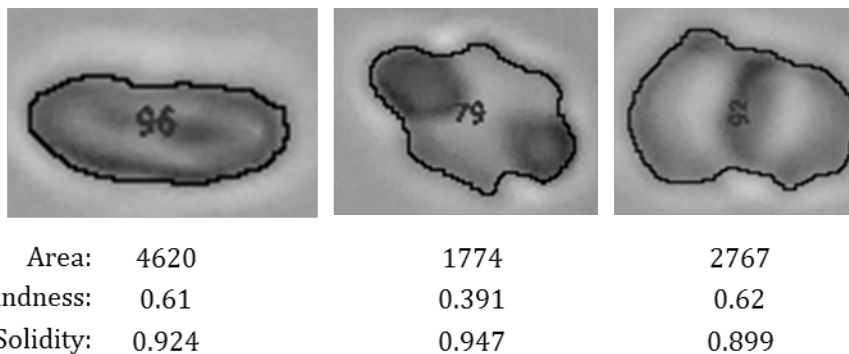

631

632

633 *Figure S8. Images of selected RBCs from a healthy sample (N03) showing RBCs lying sideways*  
634 *(left panel), crenated RBCs (middle panel) or overlapping RBCs (right panel).*

635 **9. Details of the  $P_1$  and  $P_2$  combinations used to construct the Dunn index vs. connectivity**  
 636 **plot**

Table S2: Details of the parameters used to plot Dunn index vs. connectivity

| <i>Combination number</i> | <i>Window size</i> | <i>Roundness range for <math>P_1</math></i> | <i>Roundness range for <math>P_2</math></i> | <i>Connectivity</i> | <i>Dunn index</i> |
|---------------------------|--------------------|---------------------------------------------|---------------------------------------------|---------------------|-------------------|
| 1                         | 0.2                | 0.0 – 0.2                                   | 0.2 – 0.4                                   | 2.01                | 0.07              |
| 2                         | 0.2                | 0.1 – 0.3                                   | 0.3 – 0.5                                   | 4.97                | 0.02              |
| 3                         | 0.2                | 0.2 – 0.4                                   | 0.4 – 0.6                                   | 14.75               | 0.03              |
| 4                         | 0.2                | 0.3 – 0.5                                   | 0.5 – 0.7                                   | 4.56                | 0.07              |
| 5                         | 0.2                | 0.4 – 0.6                                   | 0.6 – 0.8                                   | 15.07               | 0.08              |
| 6                         | 0.2                | 0.5 – 0.7                                   | 0.7 – 0.9                                   | 11.31               | 0.07              |
| 7                         | 0.2                | 0.6 – 0.8                                   | 0.8 – 1.0                                   | 4.03                | 0.06              |
| 8                         | 0.3                | 0.0 – 0.3                                   | 0.3 – 0.6                                   | 7.07                | 0.02              |
| 9                         | 0.3                | 0.1 – 0.4                                   | 0.4 – 0.7                                   | 12.42               | 0.05              |
| <b>10</b>                 | <b>0.3</b>         | <b>0.2 – 0.5</b>                            | <b>0.5 – 0.8</b>                            | <b>4.16</b>         | <b>0.08</b>       |
| 11                        | 0.3                | 0.3 – 0.6                                   | 0.6 – 0.9                                   | 8.15                | 0.06              |
| <b>12</b>                 | <b>0.3</b>         | <b>0.4 – 0.7</b>                            | <b>0.7 – 1.0</b>                            | <b>3.45</b>         | <b>0.14</b>       |
| 13                        | 0.4                | 0.0 – 0.4                                   | 0.4 – 0.8                                   | 11.01               | 0.09              |
| 14                        | 0.4                | 0.1 – 0.5                                   | 0.5 – 0.9                                   | 11.36               | 0.02              |
| 15                        | 0.4                | 0.2 – 0.6                                   | 0.6 – 1.0                                   | 6.77                | 0.02              |
| 16                        | 0.5                | 0.0 – 0.5                                   | 0.5 – 1.0                                   | 6.30                | 0.00              |

637 **Table S2** lists the parameters used to plot the Dunn index and connectivity values for sixteen  
 638 different combinations of  $P_1$  and  $P_2$ . We varied window widths from 0.2 to 0.5. Combination  
 639 numbers 10 and 12 with window widths of 0.3 each indicate the most promising combinations and  
 640 these were used to analyze the data of 35 unknown samples.

641 **10. An alternate classification scheme**

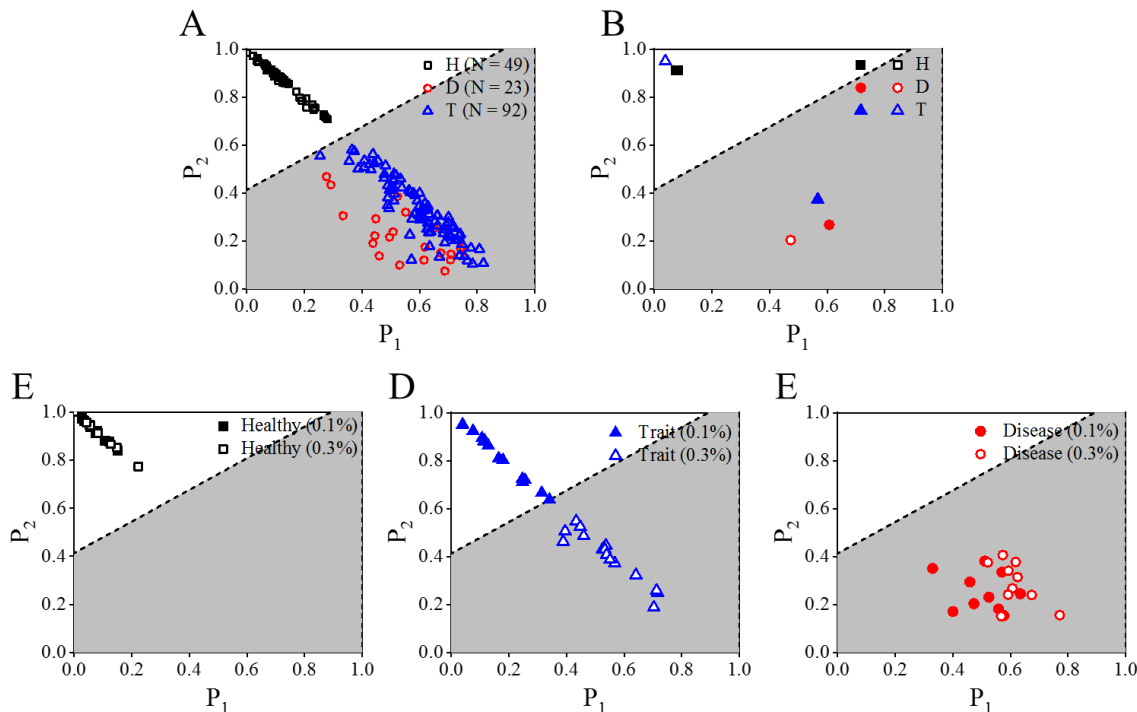

642

643 *Figure S9. An alternate classifier based on the parameter values of  $P_1$ : 0.4 – 0.7 and  $P_2$ : 0.7 – 1.0.*  
 644 *(A) In a plot of 164 known samples ( $H = 49$ ,  $D = 23$  and  $T = 92$ ), the dotted line indicates the*  
 645 *classifier that separates healthy and sickle blood samples. The white area in all the plots indicates*  
 646 *the parameter space for healthy samples, while the grey area indicates the parameter space for*  
 647 *sickle (disease and trait) samples. (B) Both points corresponding to a healthy sample treated with*  
 648 *0.1% and 0.3% sodium metabisulphite lie above the classifier, while the corresponding points for*  
 649 *a disease sample lie below the classifier. The point corresponding to a trait sample treated with*  
 650 *0.1% sodium metabisulphite lies in the space (white area) for healthy samples. The point for a trait*  
 651 *sample treated with 0.3% sodium metabisulphite lies in the sickle (grey) zone. (C-E) Validation*  
 652 *data for healthy ( $H = 10$ ), trait ( $T = 15$ ) and disease ( $D = 10$ ) samples. All 35 unknown samples*  
 653 *were accurately identified by this classifier*

654

655 **11. Workflow for image analysis of RBCs**

656 RGB images captured by the smartphone are converted into 8-bit grayscale images. After  
 657 background subtraction and automatic thresholding, morphological operations are performed to  
 658 obtain the outlines of the RBCs. Using an area filter, we rule out RBCs with areas  $<500$  pixels  
 659 ( $\sim 2.5 \mu\text{m}^2$ ) as possible debris  $> 7500$  pixels ( $\sim 9.8 \mu\text{m}^2$ ) as clusters of RBCs. The detailed steps in  
 660 ImageJ are described below.

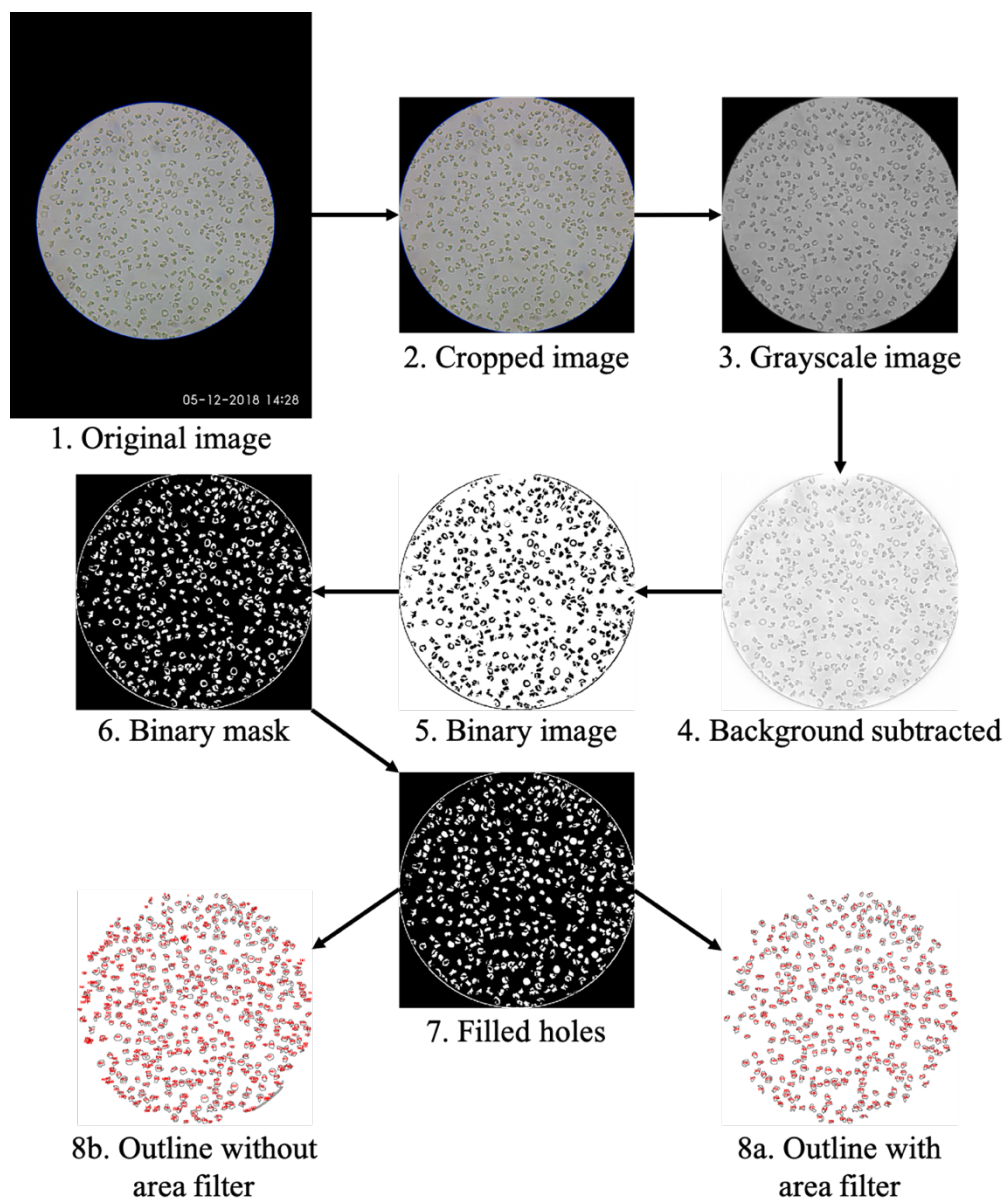

661

662 *Figure S10. The steps involved in image analysis. The original image (1) is opened in ImageJ and*  
663 *the area of interest is cropped (2). Then image is converted into an 8-bit grayscale image (3) and*  
664 *its background is subtracted to bring the RBCs in the foreground (4). The image is then binarized*  
665 *(5) and converted into a binary mask (6) to get the RBCs as white particles. The holes in the*  
666 *particles are filled to fill the center of the unfocused part of biconcave RBCs (7). Then the RBCs*  
667 *are analyzed to get their solidity, roundness values and outlines. 8a shows the outlines of the RBCs*  
668 *when an area filter is applied to fit the RBC sizes, while 8b shows the outlines without an area*  
669 *filter.*

670



671 The captured image **(1)** is first cropped **(2)** to fit the field of view and converted into an 8-bit  
672 grayscale image **(3)**. We then subtract the background with a rolling ball radius of 50 pixels **(4)**.  
673 Next, we make the grayscale image into a binary one using the automatic thresholding algorithm  
674 of ImageJ. The RBCs appear black on a white background **(5)**. This binary image is then converted  
675 into a mask, to make the RBCs appear white against a black background **(6)**. On the masked binary  
676 image, we perform the operation ‘fill holes’ **(7)**. This is required as the central part of the biconcave  
677 RBCs remain out of focus, making these RBCs appear doughnut-shaped in the binary image. We  
678 then analyze the particles (RBCs) to get a list of unique identifiers for each RBC and their shape  
679 descriptors including roundness and solidity. Next, we apply an area filter described earlier to  
680 exclude debris and connected cells **(8a)**. The panel **8b** shows the same cells without the area filter.  
681 We then apply a solidity cut-off, where all RBCs with solidity  $<0.8$  are excluded. The RBCs  
682 remaining after this step are used to plot the roundness distributions.

683

## 684 **12. Captions of movies uploaded as supporting information**

685

686 **Movie 1:** Sickling video of a disease sample treated with 0.1% sodium metabisulphite. The 30 min  
687 video has been sped up 29.5 times. The sample ID is D188.

688 **Movie 2:** Sickling video of a disease sample treated with 0.3% sodium metabisulphite. The 30 min  
689 video has been sped up 29.8 times. The sample ID is D188.

690 **Movie 3:** Sickling video of a trait sample treated with 0.1% sodium metabisulphite. The 30 min  
691 video has been sped up 29.5 times. The sample ID is T187.

692 **Movie 4:** Sickling video of a trait sample treated with 0.3% sodium metabisulphite. The 30 min  
693 video has been sped up 29.5 times. The sample ID is T187.
